# Supplementary material for: Herbicide use in farming and other jobs in relation to non-Hodgkin’s lymphoma (NHL) risk
Source: PubMed Central journal article supplement — Occup Environ Med. 2022 Oct 7;79(12):795–806. doi: 10.1136/oemed-2022-108371 (PMC9669193; doi:10.1136/oemed-2022-108371), 2022-10-07

**Supplemental Figure 1. Meta-analysis forest plots of selected associations between herbicide use and risk of all non-Hodgkin lymphoma (NHL) and NHL subtypes (individual-study estimates are odds ratios (OR) and 95% confidence intervals (CI) from logistic regression models, with adjustment for study center, age, gender, socioeconomic status (SES), race/ethnicity, and set of covariates for use of other pesticides; meta-OR (overall) estimates are from random effects meta-analysis). NHL Subtypes: DLBCL=diffuse large B-cell lymphoma; FL=follicular lymphoma; MM=multiple myeloma; OBCL=other B-cell lymphoma; TCL=T-cell lymphoma.**

**Any herbicide use, all NHL**

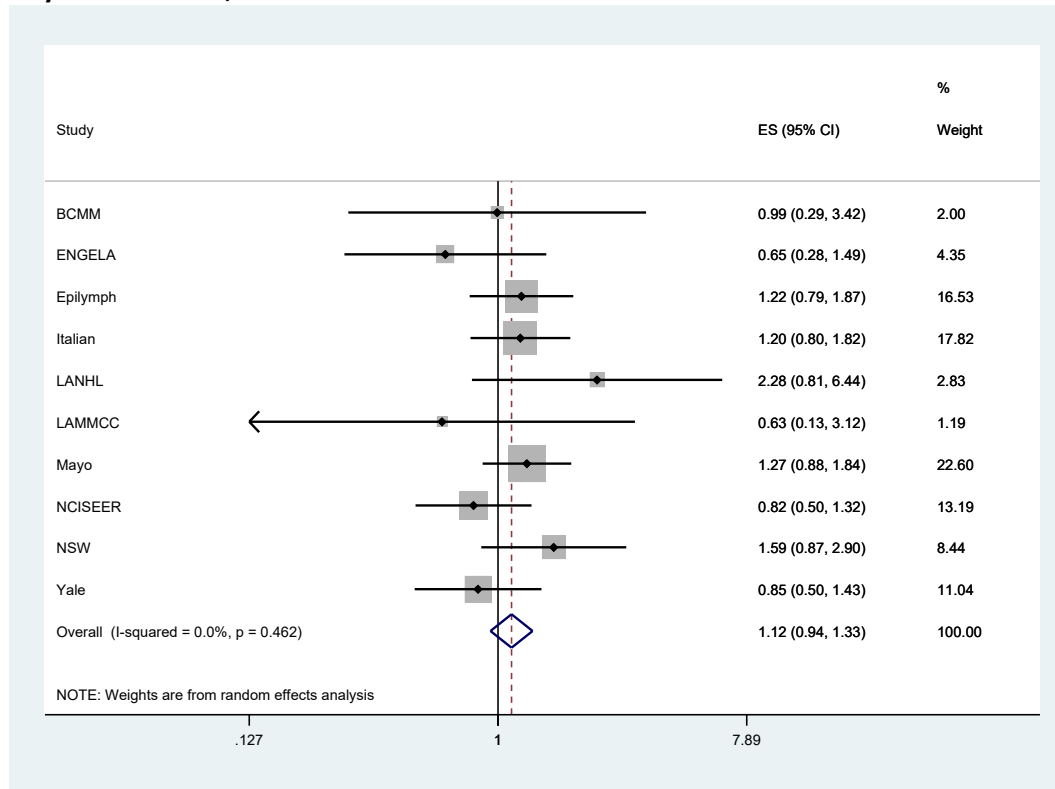

**Any herbicide use TCL**

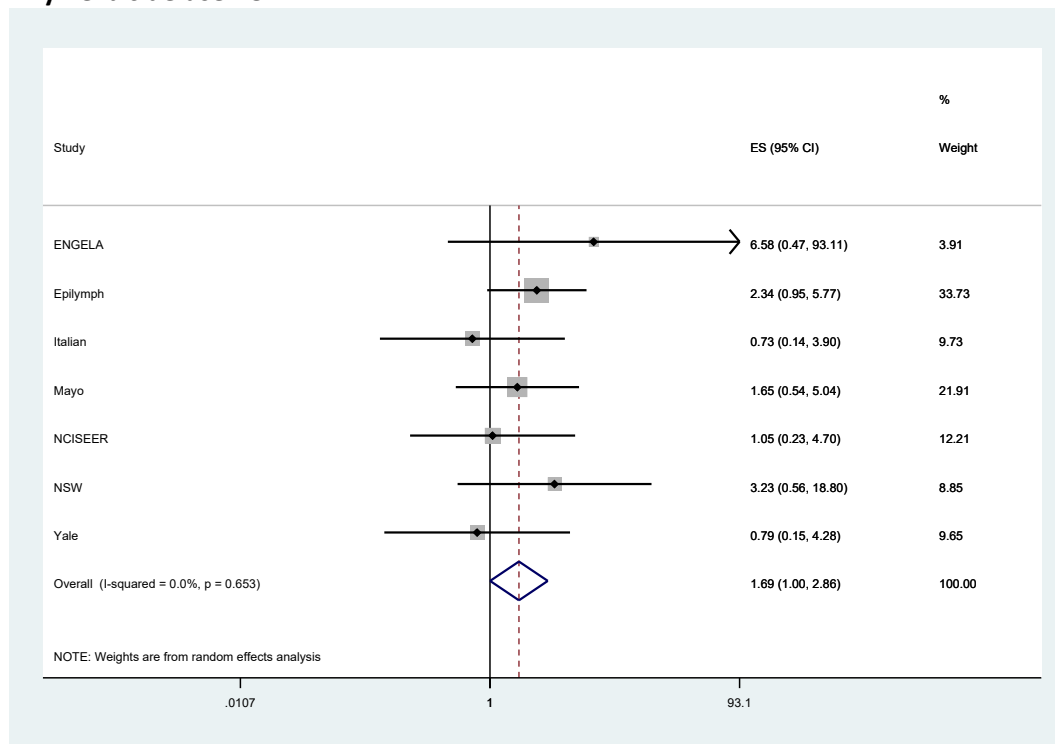

## Phenoxy herbicide use, all NHL

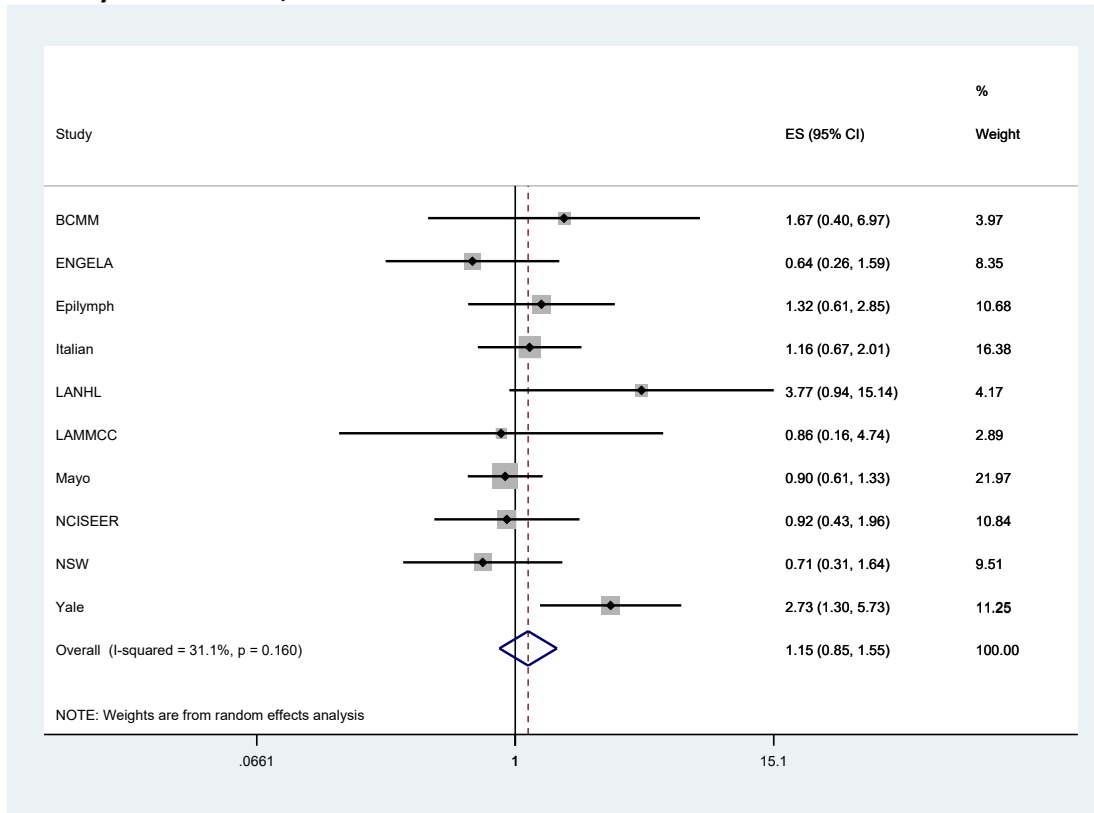

## Phenoxy herbicide use duration >8 years, all NHL

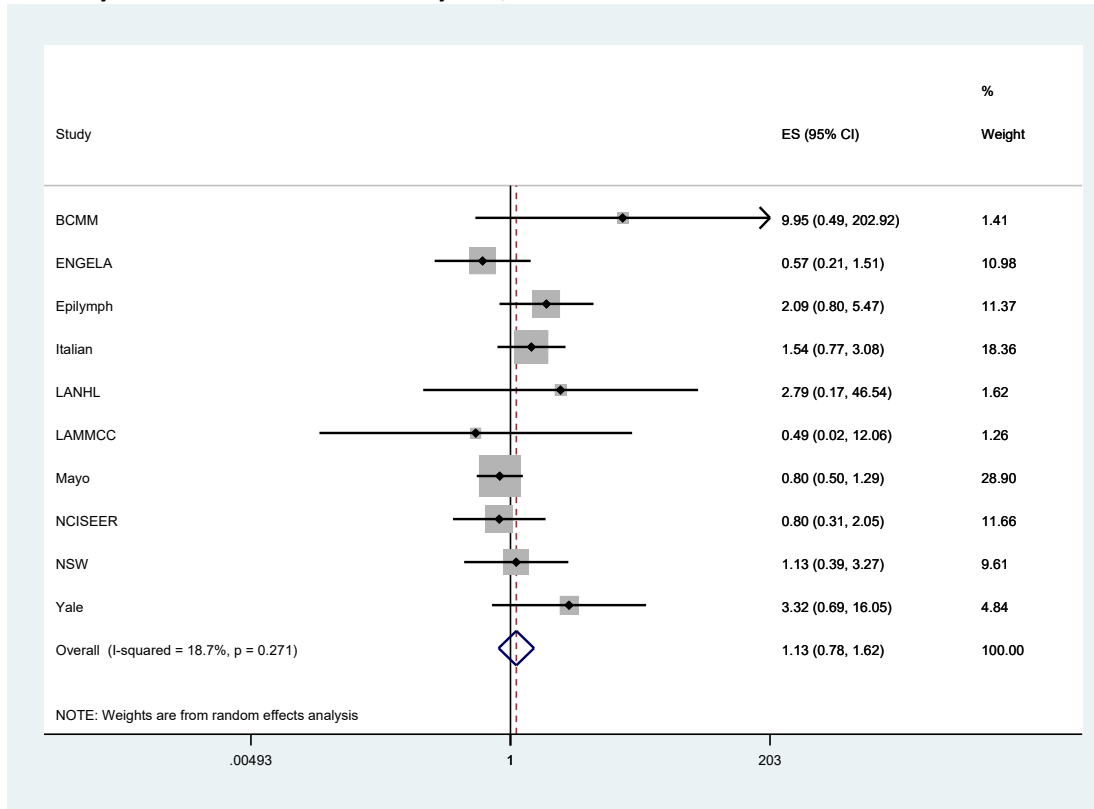

## Phenoxy herbicide use, MM

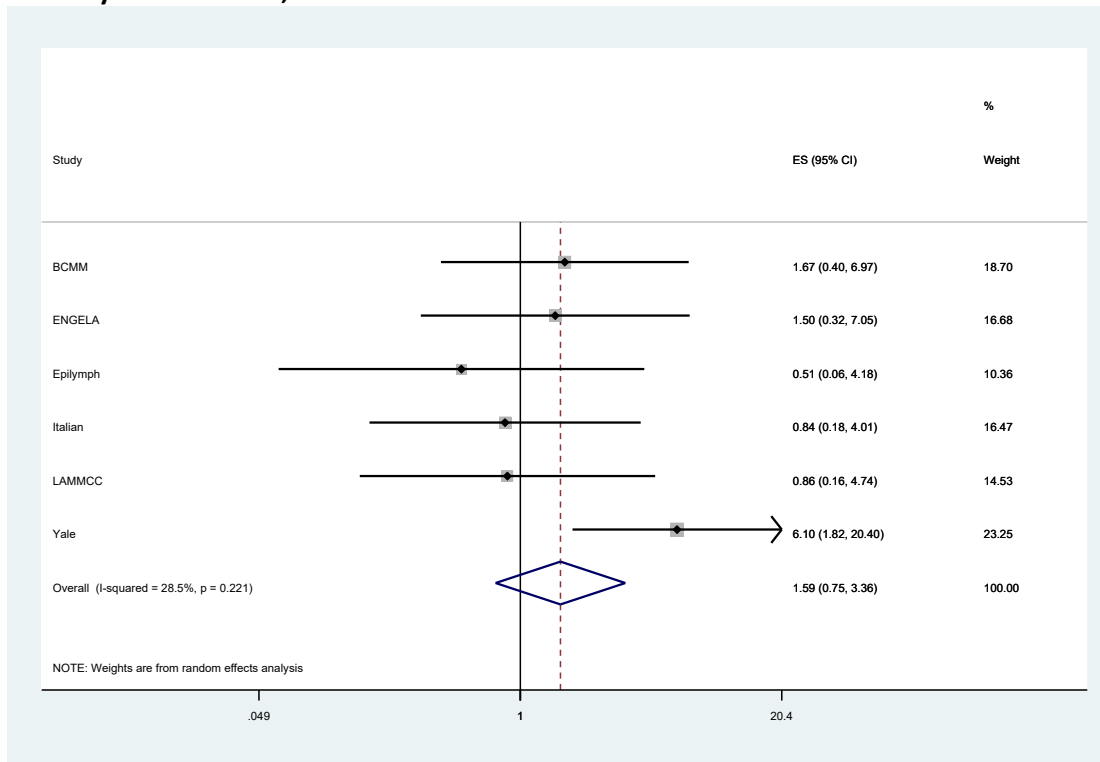

## Phenoxy herbicide use duration >8 years, MM

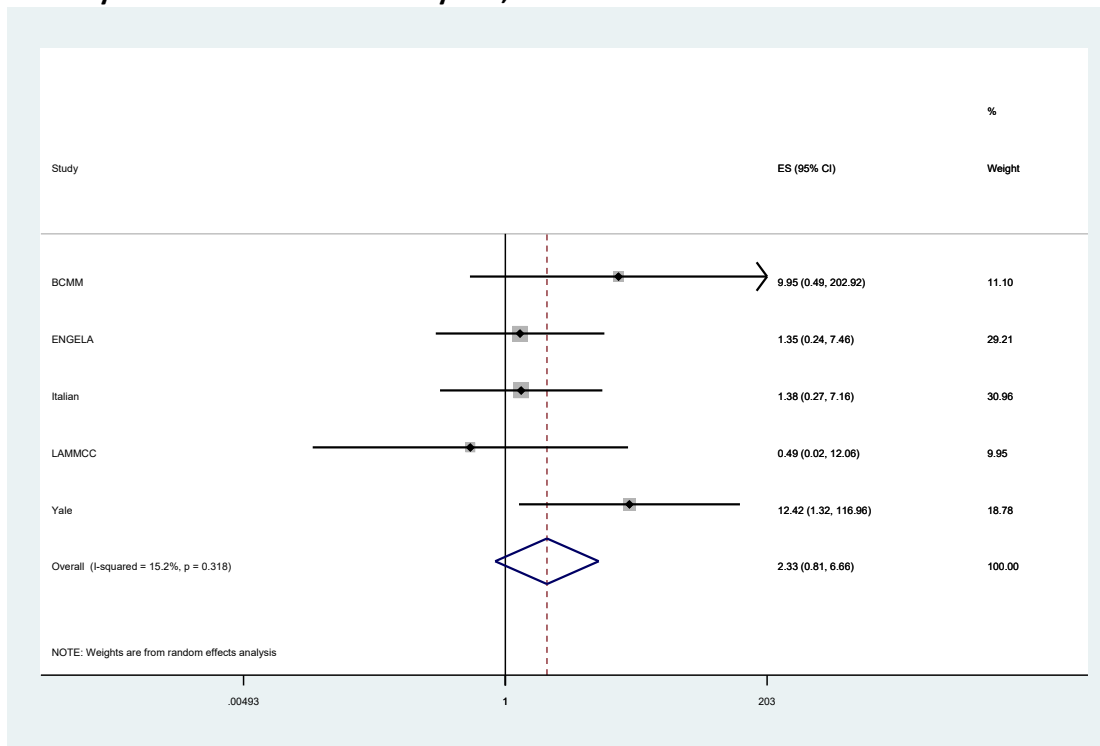

## 2,4-D use, all NHL

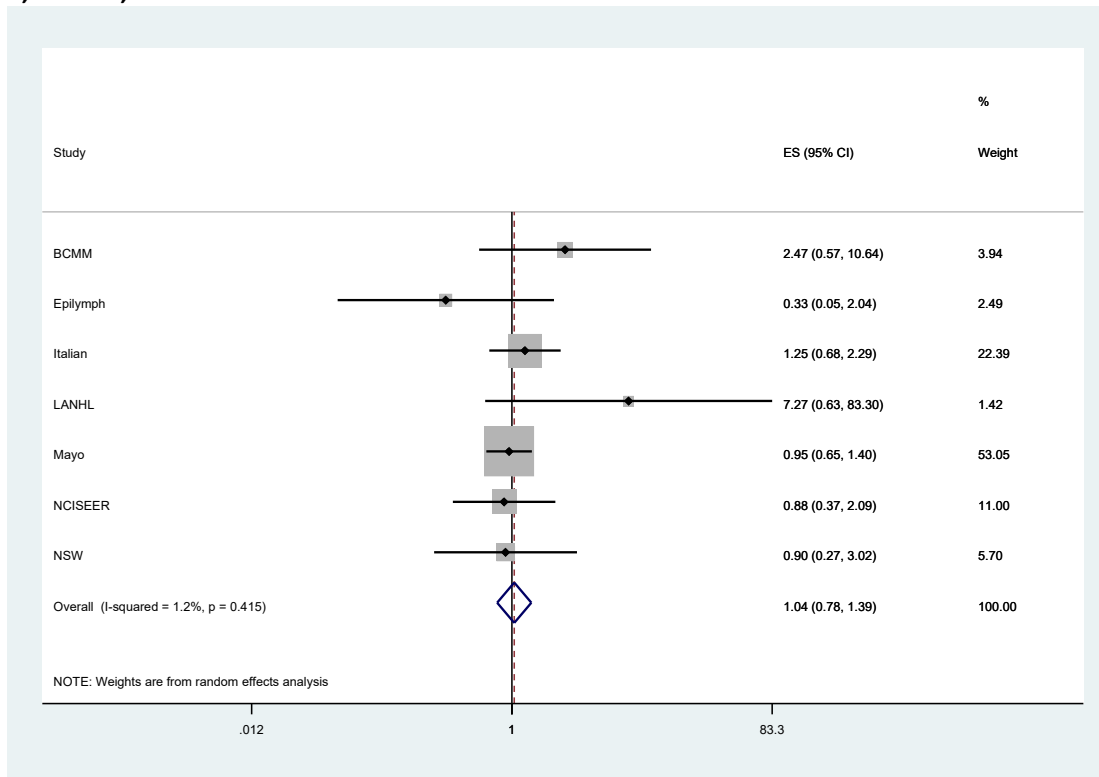

## 2,4-D use duration >8 years, all NHL (BCMM excluded due to 0% weight)

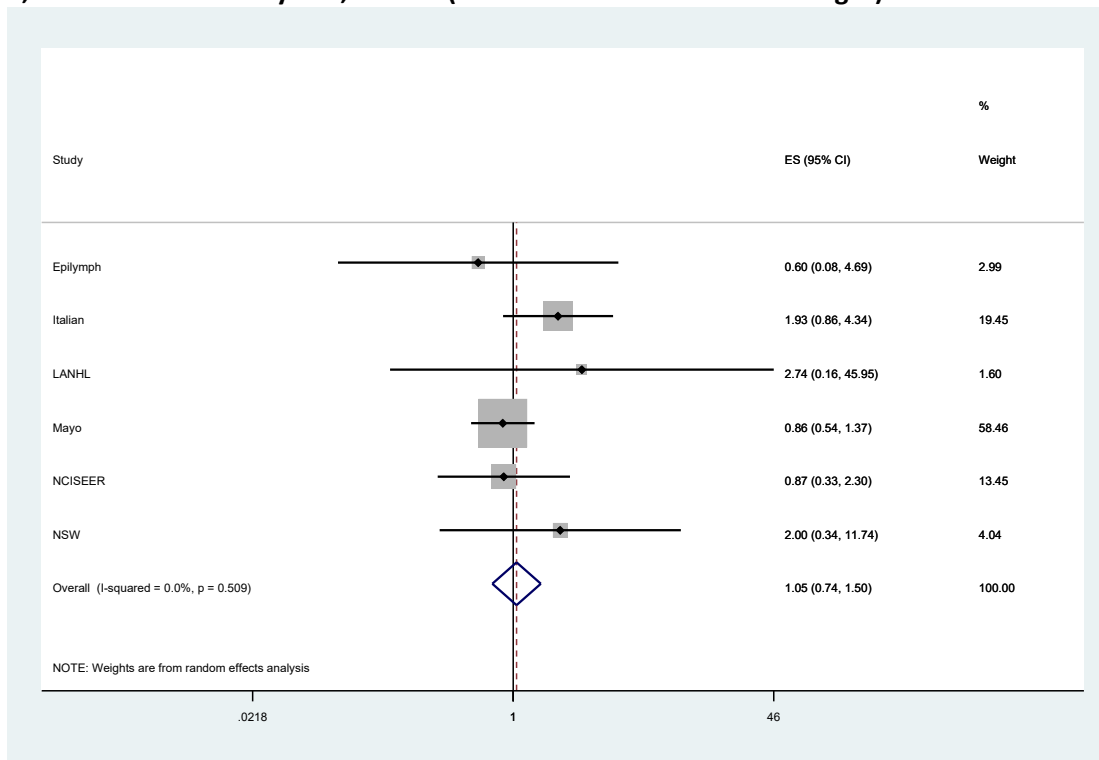

## 2,4-D use duration >8 years, DLBCL

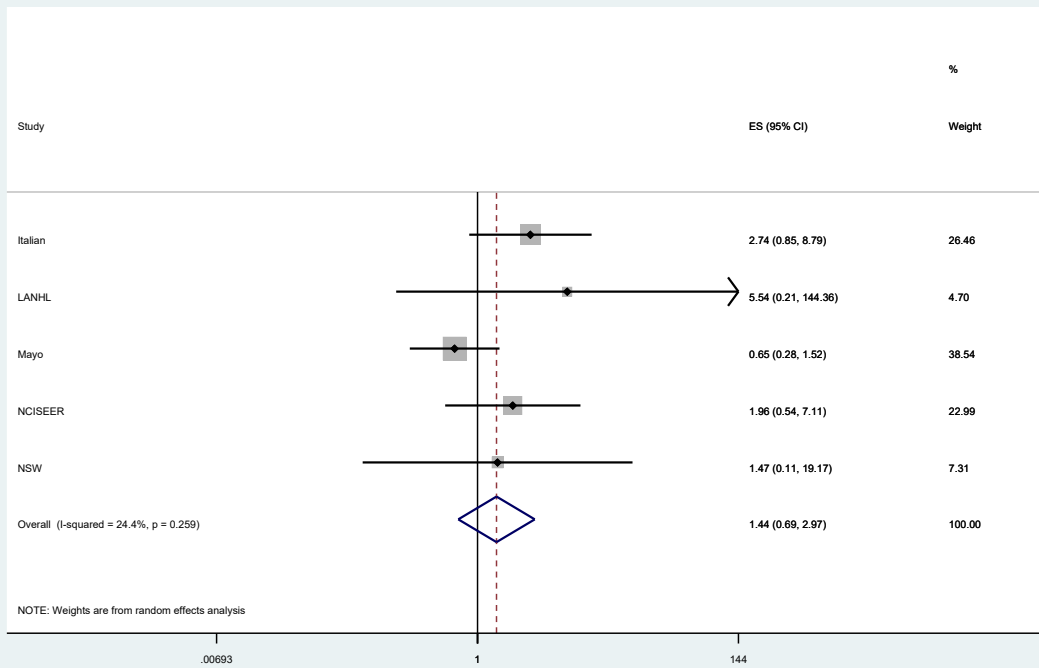

## 2,4-D use duration >8 years, OBCL

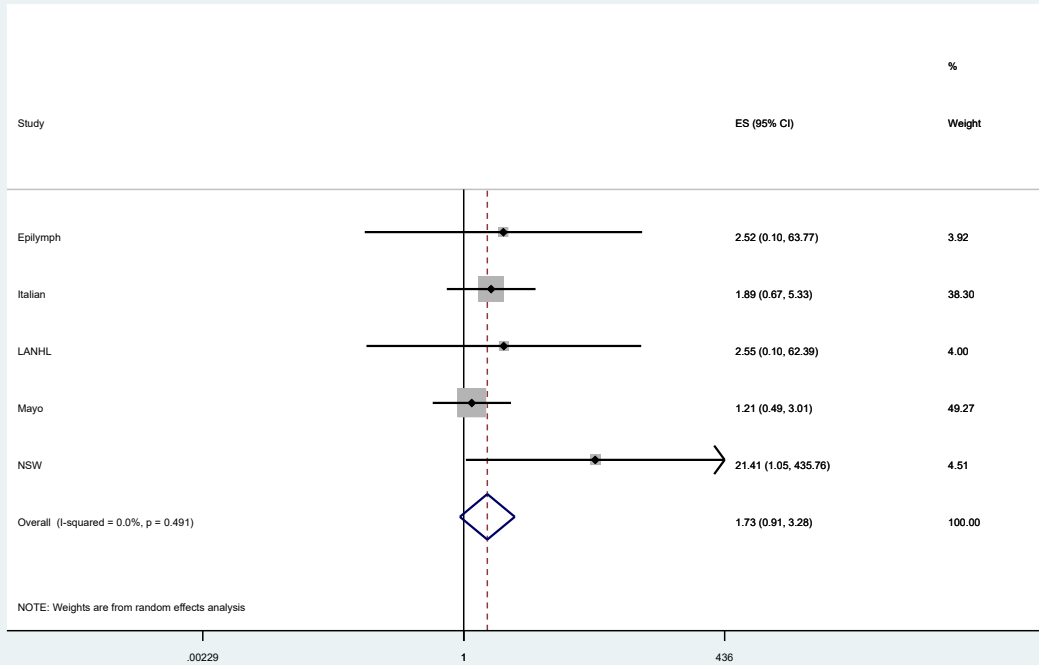

## Glyphosate use, all NHL

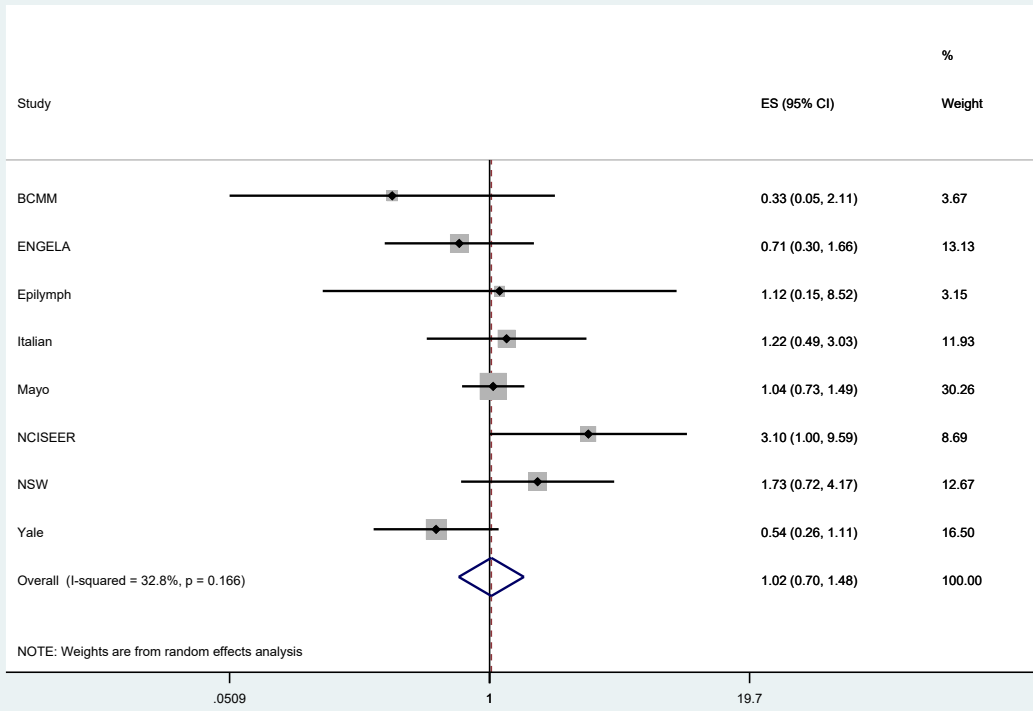

## Glyphosate lagged-use (10-year lag), all NHL

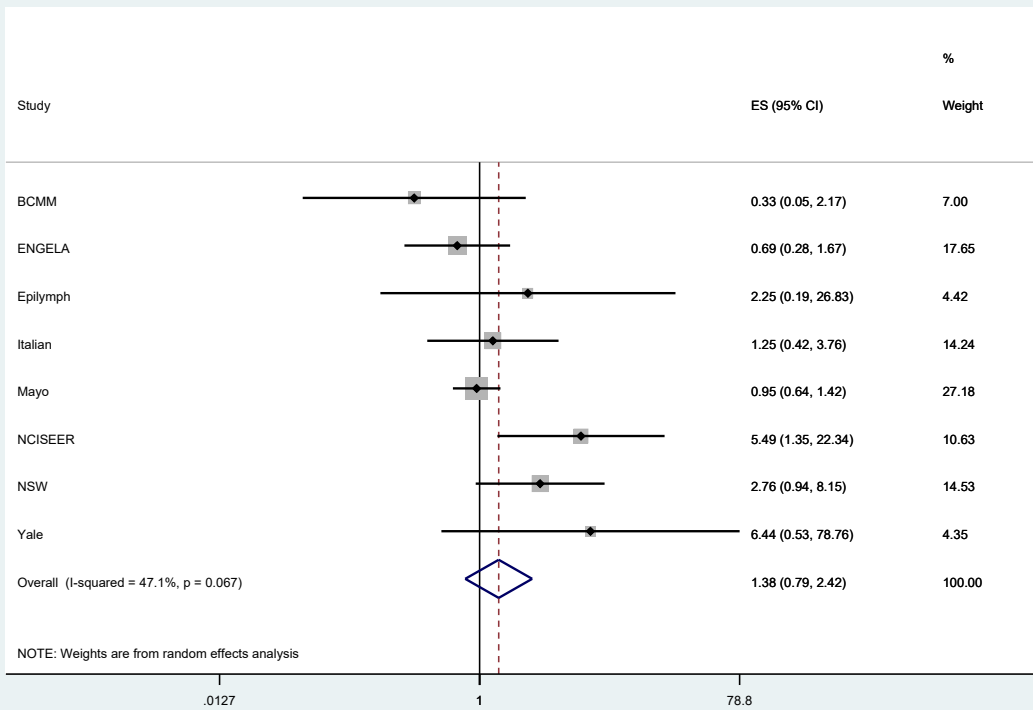

## Glyphosate use, FL

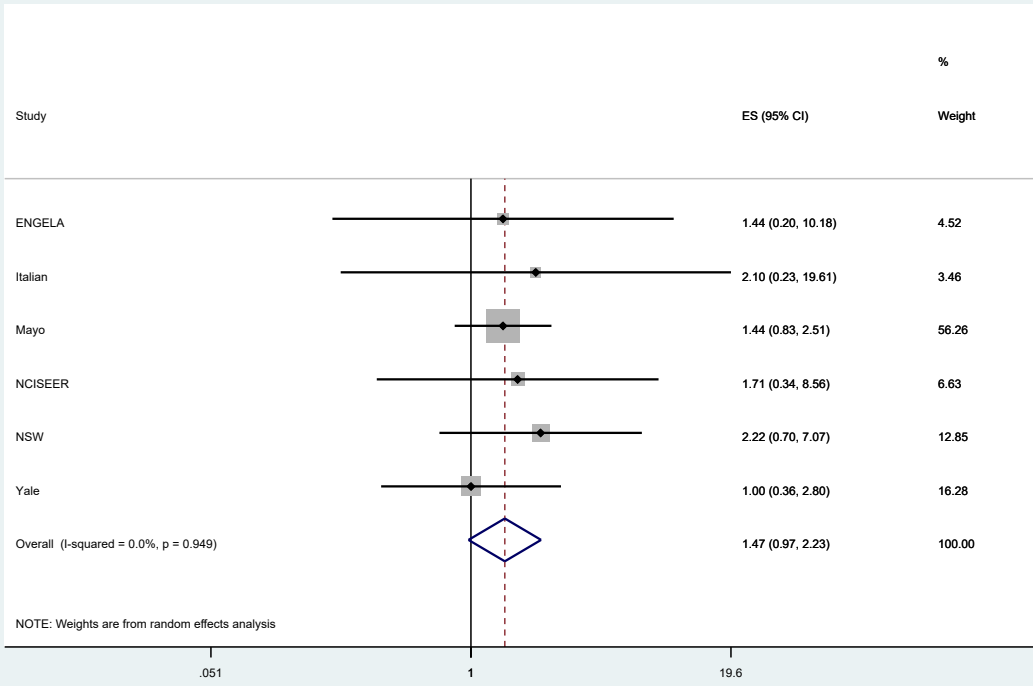

## Glyphosate lagged-use (10-year lag), FL

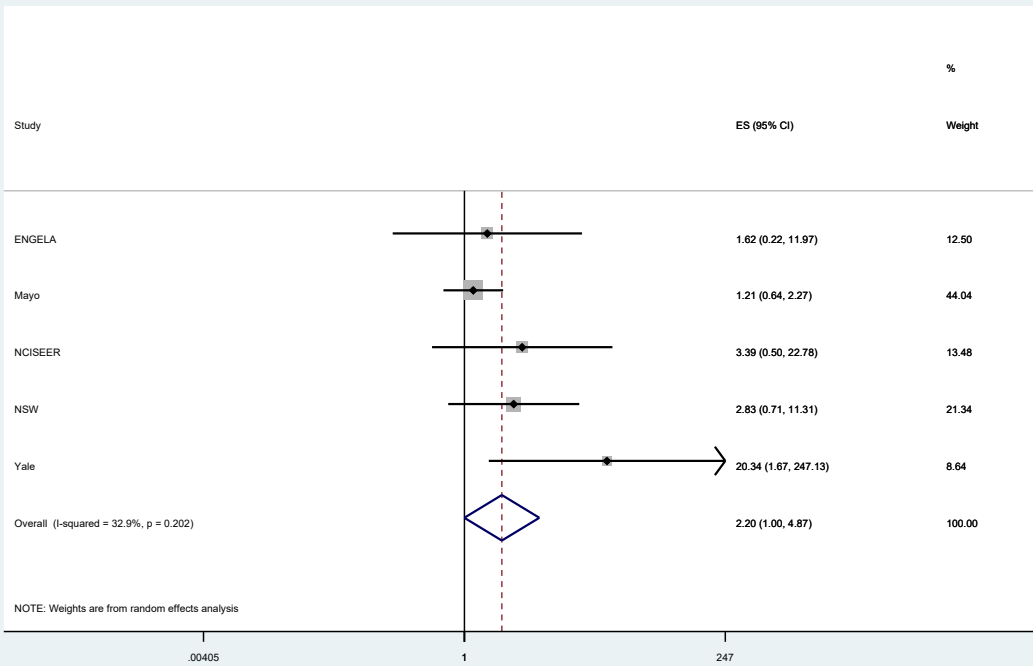

**Glyphosate lagged-use (10-year lag) duration ≤8 years, FL (NCISEER excluded due to 0% weight)**

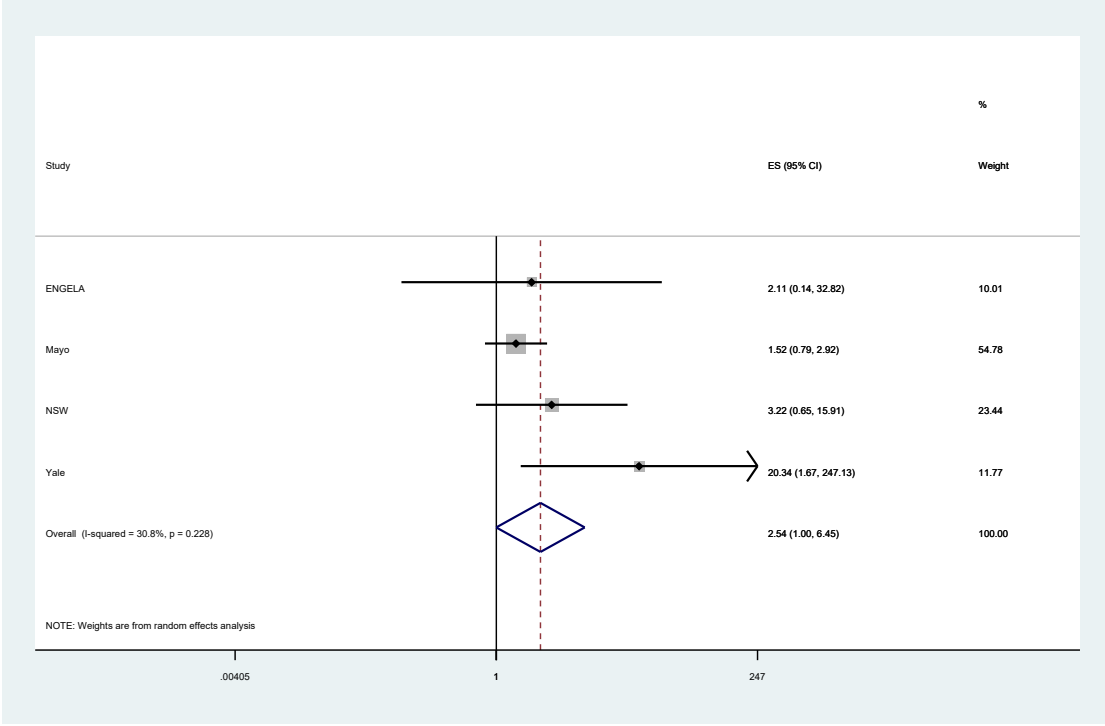

**Glyphosate lagged-use (10-year lag) duration >8 years, FL**

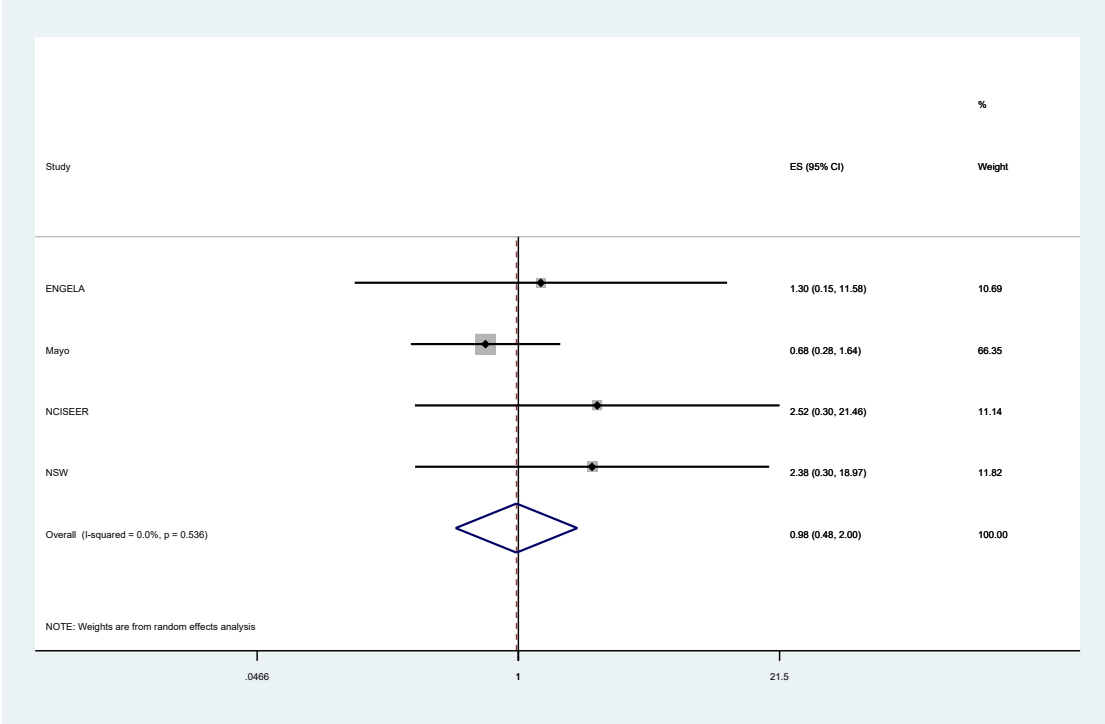



### Glyphosate lagged-use (10-year lag), DLBCL

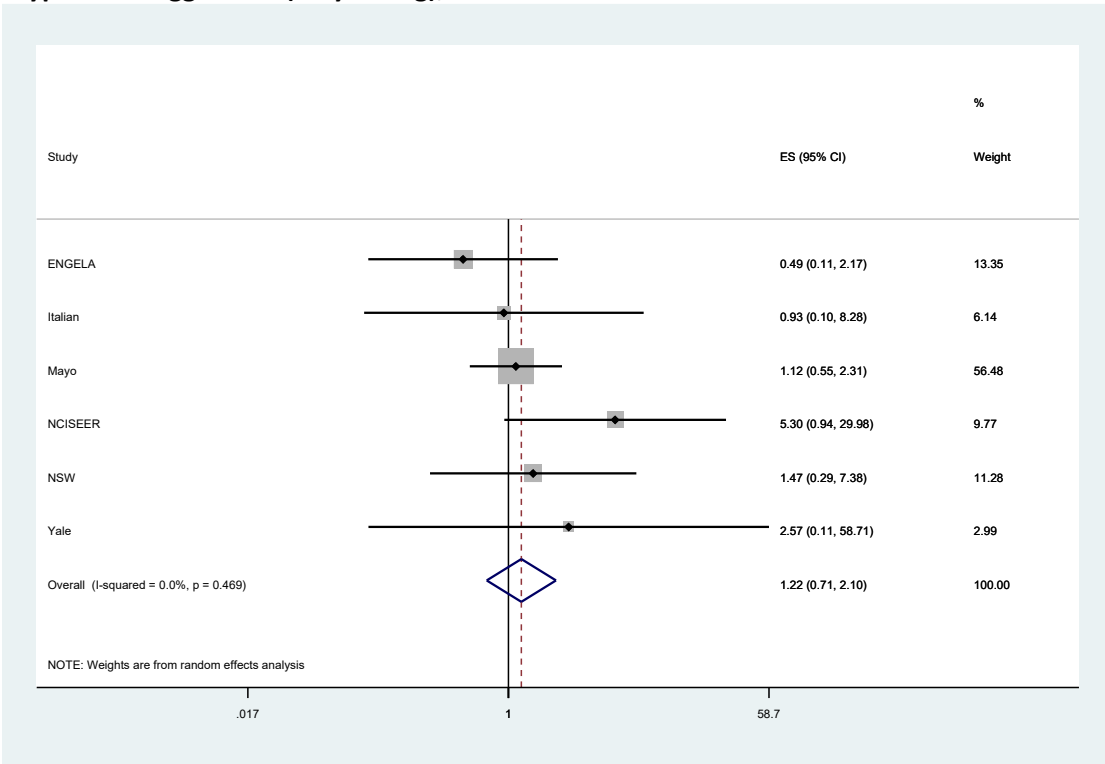

### Glyphosate lagged-use (10-year lag), TCL

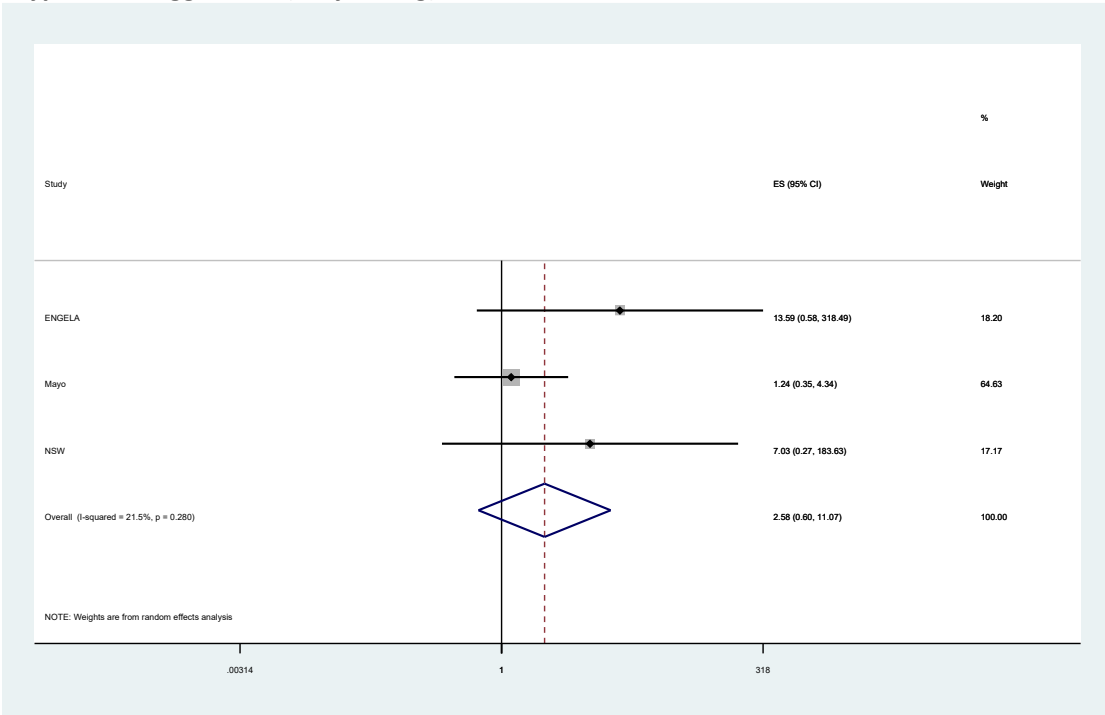

Supplement: NIHMS1842503-supplement-Supp2.pdf [file NIHMS1842503-supplement-Supp2.pdf]
