# Supplementary material for: Herbicide use in farming and other jobs in relation to non-Hodgkin’s lymphoma (NHL) risk
Source: HighWire-hosted journal article supplement (doi:10.1136/oemed-2022-108371), 2022-10-07
Supplement: oemed-2022-108371supp004_data_supplement.xlsx [file oemed-2022-108371supp004_data_supplement.xlsx]

## Sheet: Supplemental Table 2
Supplemental Table 2. Main analysis for associations between occupational herbicide use and risk of non-Hodgkin lymphoma (NHL) and NHL subtypes (odds ratios (OR) and 95% confidence intervals (CI) from logistic regression models, with adjustment for study center, age, gender, socioeconomic status (SES), race/Hispanic ethnicity, farm work history, and a set of covariates for use of other pesticides…
rownum	herbicide	level	ncntl	ncase_allNHL	or_allNHL	lcl_allNHL	ucl_allNHL	ptrend_allNHL	ncase_CLL	or_CLL	lcl_CLL	ucl_CLL	ptrend_CLL	ncase_DLBCL	or_DLBCL	lcl_DLBCL	ucl_DLBCL	ptrend_DLBCL	ncase_FL	or_FL	lcl_FL	ucl_FL	ptrend_FL	ncase_OBCL	or_OBCL	lcl_OBCL	ucl_OBCL	ptrend_OBCL	ncase_MM	or_MM	lcl_MM	ucl_MM	ptrend_MM	ncase_TCL	or_TCL	lcl_TCL	ucl_TCL	ptrend_TCL
1	Any herbicide	never	9030	8585					1473					2031					1451					1482					1299					422
2	Any herbicide	ever-use	596	644	1.1	(0.94	1.29)		165	0.99	(0.74	1.31)		129	1.07	(0.82	1.39)		136	1.13	(0.85	1.52)		99	1.08	(0.80	1.44)		56	1.18	(0.81	1.71)		34	1.4	(0.87	2.27)
3
4	Any herbicide	>0 to 5 years before diagnosis	174	202	1.07	(0.78	1.47)		37	1.41	(0.81	2.46)		45	0.92	(0.55	1.54)		39	0.87	(0.51	1.47)		35	0.95	(0.53	1.70)		21	1.68	(0.84	3.37)		13	0.94	(0.38	2.32)
5	Any herbicide	>5 to 10 years before diagnosis	200	222	0.91	(0.64	1.29)		41	0.6	(0.33	1.10)		51	1.03	(0.58	1.84)		48	1.29	(0.73	2.30)		42	1.08	(0.56	2.07)		14	0.38	(0.14	1.07)		15	1.76	(0.61	5.05)
6	Any herbicide	>10 to 20 years before diagnosis	277	318	1.2	(0.92	1.56)		80	1.28	(0.85	1.91)		69	1.27	(0.81	1.99)		67	1.13	(0.73	1.77)		57	1.42	(0.86	2.34)		19	1.48	(0.63	3.49)		16	0.8	(0.32	1.95)
7	Any herbicide	>20 years before diagnosis	440	445	0.92	(0.75	1.12)		126	0.8	(0.58	1.11)		86	0.88	(0.63	1.24)		92	0.86	(0.60	1.23)		64	0.75	(0.51	1.11)		38	1.06	(0.63	1.77)		21	1.15	(0.60	2.18)
8
9	Any herbicide	use in 1950s	169	162	0.81	(0.61	1.09)		42	0.62	(0.39	0.98)		38	0.99	(0.61	1.63)		30	0.97	(0.57	1.65)		22	0.66	(0.37	1.17)		25	1.6	(0.80	3.18)		2	0.29	(0.06	1.34)
10	Any herbicide	use in 1960s	261	281	1.31	(0.98	1.75)		82	1.67	(1.06	2.64)		59	1.53	(0.93	2.53)		49	0.86	(0.51	1.43)		42	1.31	(0.76	2.27)		26	1.39	(0.60	3.24)		9	0.68	(0.27	1.72)
11	Any herbicide	use in 1970s	330	337	0.87	(0.65	1.17)		90	0.59	(0.37	0.96)		61	0.7	(0.42	1.17)		71	1.11	(0.68	1.81)		53	0.73	(0.42	1.28)		25	0.72	(0.30	1.73)		21	3.28	(1.42	7.56)
12	Any herbicide	use in 1980s	343	361	1.03	(0.79	1.36)		95	1.13	(0.72	1.77)		69	0.94	(0.58	1.50)		72	0.91	(0.57	1.46)		65	1.73	(1.04	2.87)		28	1.16	(0.54	2.49)		18	0.45	(0.18	1.12)
13	Any herbicide	use in 1990s	277	295	0.82	(0.63	1.06)		71	0.82	(0.53	1.26)		64	0.88	(0.56	1.36)		63	0.97	(0.63	1.51)		43	0.53	(0.31	0.89)		22	0.61	(0.29	1.27)		20	1.67	(0.80	3.48)
14	Any herbicide	use in 2000s or later	82	121	1.78	(1.26	2.52)		28	1.35	(0.77	2.34)		29	2.18	(1.27	3.75)		25	1.32	(0.75	2.32)		20	2.5	(1.34	4.68)		9	3.34	(1.24	8.98)		6	1.08	(0.40	2.91)
15
16	Any herbicide	lagged use (10-year lag)	502	542	1.12	(0.94	1.33)		150	1.01	(0.75	1.36)		108	1.11	(0.84	1.47)		113	1.14	(0.83	1.57)		82	1.07	(0.78	1.47)		42	1.1	(0.71	1.69)		26	1.35	(0.79	2.30)
17
18	Any herbicide	duration <=12 years	302	323	1.11	(0.92	1.33)		78	1.03	(0.74	1.42)		63	1.02	(0.75	1.40)		78	1.25	(0.91	1.72)		44	0.97	(0.67	1.39)		30	1.13	(0.72	1.78)		17	1.31	(0.74	2.31)
19	Any herbicide	duration >12 years	289	311	1.09	(0.89	1.35)		86	0.92	(0.65	1.30)		64	1.15	(0.82	1.63)		55	0.96	(0.64	1.42)		52	1.17	(0.80	1.70)		26	1.26	(0.74	2.16)		16	1.5	(0.79	2.84)
20	Any herbicide							0.48					0.6					0.42					0.57					0.4					0.39					0.25
21
22	Any herbicide	lagged (10-year lag) duration <=12 years	256	276	1.13	(0.93	1.39)		77	1.16	(0.82	1.62)		57	1.12	(0.80	1.57)		63	1.24	(0.87	1.76)		38	0.97	(0.65	1.43)		17	0.8	(0.44	1.46)		13	1.26	(0.66	2.41)
23	Any herbicide	lagged (10-year lag) duration >12 years	245	265	1.1	(0.88	1.37)		73	0.86	(0.59	1.24)		51	1.11	(0.76	1.62)		50	1.01	(0.66	1.53)		43	1.18	(0.78	1.76)		25	1.49	(0.85	2.61)		13	1.5	(0.75	3.01)
24	Any herbicide							0.41					0.31					0.53					0.93					0.39					0.22					0.17
25
26	Any herbicide	duration <=12 years	302	323	1.11	(0.92	1.33)		78	1.03	(0.74	1.42)		63	1.02	(0.75	1.40)		78	1.25	(0.91	1.72)		44	0.97	(0.67	1.39)		30	1.13	(0.72	1.79)		17	1.31	(0.74	2.31)
27	Any herbicide	duration >12 to 25.5 years	157	182	1.23	(0.95	1.58)		58	1.14	(0.77	1.69)		35	1.24	(0.81	1.90)		28	0.93	(0.57	1.50)		34	1.41	(0.91	2.20)		9	1	(0.44	2.24)		13	2.21	(1.11	4.41)
28	Any herbicide	duration >25.5 years	132	129	0.94	(0.71	1.25)		28	0.66	(0.40	1.07)		29	1.05	(0.66	1.67)		27	0.99	(0.60	1.65)		18	0.87	(0.50	1.52)		17	1.44	(0.75	2.80)		3	0.62	(0.18	2.10)
29	Any herbicide							0.94					0.19					0.61					0.7					0.85					0.31					0.8
30
31	Any herbicide	lagged (10-year lag) duration <=12 years	256	276	1.12	(0.92	1.38)		77	1.14	(0.82	1.60)		57	1.12	(0.80	1.56)		63	1.22	(0.86	1.74)		38	0.95	(0.64	1.41)		17	0.8	(0.44	1.45)		13	1.23	(0.64	2.34)
32	Any herbicide	lagged (10-year lag) duration >12 to 25 years	110	143	1.32	(1000	1.75)		36	1	(0.64	1.58)		25	1.24	(0.76	2.00)		26	1.22	(0.74	2.03)		28	1.55	(0.97	2.49)		12	1.49	(0.70	3.18)		11	2.46	(1.18	5.13)
33	Any herbicide	lagged (10-year lag) duration >25 years	135	122	0.89	(0.66	1.19)		37	0.72	(0.45	1.16)		26	0.99	(0.60	1.62)		24	0.82	(0.48	1.40)		15	0.79	(0.43	1.44)		13	1.47	(0.69	3.12)		2	0.45	(0.10	1.97)
34	Any herbicide							0.94					0.18					0.75					0.7					0.99					0.28					0.8
35
36	Phenoxy herbicides	never	9256	8834					1524					2089					1509					1518					1327					433
37	Phenoxy herbicides	ever-use	370	395	1.12	(0.90	1.38)		114	1.05	(0.73	1.50)		71	1.04	(0.73	1.49)		78	0.75	(0.51	1.11)		63	1.28	(0.87	1.88)		28	1.43	(0.85	2.40)		23	1.85	(0.98	3.48)
38
39	Phenoxy herbicides	>0 to 5 years before diagnosis	79	100	1.55	(0.99	2.42)		12	0.9	(0.38	2.15)		23	1.33	(0.63	2.79)		20	1.32	(0.62	2.82)		18	1.22	(0.53	2.84)		13	3.44	(1.39	8.52)		8	4.32	(1.42	13.1)
40	Phenoxy herbicides	>5 to 10 years before diagnosis	103	106	0.72	(0.44	1.18)		19	0.71	(0.31	1.62)		26	0.94	(0.41	2.16)		23	0.74	(0.33	1.68)		22	1.4	(0.55	3.55)		8	0.48	(0.13	1.83)		5	0.19	(0.04	0.89)
41	Phenoxy herbicides	>10 to 20 years before diagnosis	163	170	1.02	(0.72	1.44)		43	0.91	(0.54	1.54)		35	1.11	(0.60	2.05)		38	1.19	(0.68	2.09)		30	0.9	(0.45	1.80)		10	1.17	(0.37	3.75)		10	1.47	(0.53	4.07)
42	Phenoxy herbicides	>20 years before diagnosis	288	290	1	(0.79	1.28)		95	1.09	(0.75	1.59)		50	0.92	(0.60	1.40)		54	0.63	(0.41	0.97)		44	0.98	(0.62	1.54)		18	1.05	(0.50	2.22)		15	1.44	(0.67	3.11)
43
44	Phenoxy herbicides	use in 1950s	108	99	0.73	(0.51	1.04)		30	0.67	(0.39	1.17)		22	0.85	(0.46	1.58)		15	0.56	(0.29	1.09)		18	0.94	(0.48	1.84)		10	1.1	(0.39	3.09)		2	0.44	(0.09	2.21)
45	Phenoxy herbicides	use in 1960s	158	182	1.41	(0.99	1.99)		56	1.49	(0.89	2.51)		37	1.67	(0.92	3.04)		33	1.29	(0.72	2.30)		28	1.34	(0.68	2.64)		11	1.02	(0.30	3.46)		7	0.75	(0.24	2.33)
46	Phenoxy herbicides	use in 1970s	191	206	1.09	(0.77	1.55)		65	1.15	(0.69	1.91)		36	1.01	(0.54	1.88)		39	0.91	(0.51	1.61)		29	0.7	(0.35	1.40)		13	0.86	(0.24	3.04)		14	3.11	(1.14	8.44)
47	Phenoxy herbicides	use in 1980s	195	193	0.78	(0.55	1.12)		54	0.65	(0.37	1.12)		34	0.7	(0.37	1.34)		38	0.78	(0.43	1.41)		34	1.34	(0.68	2.63)		15	1.31	(0.43	4.04)		12	0.79	(0.27	2.31)
48	Phenoxy herbicides	use in 1990s	144	155	0.99	(0.69	1.42)		38	0.97	(0.54	1.73)		30	0.93	(0.49	1.73)		32	0.99	(0.55	1.77)		25	0.97	(0.48	1.95)		13	1.09	(0.42	2.84)		11	1.47	(0.56	3.91)
49	Phenoxy herbicides	use in 2000s or later	55	63	1.3	(0.82	2.07)		15	1.08	(0.51	2.29)		14	1.81	(0.83	3.93)		11	0.79	(0.35	1.78)		11	1.49	(0.63	3.53)		5	3.6	(0.94	13.7)		3	0.68	(0.17	2.76)
50
51	Phenoxy herbicides	lagged use (10-year lag)	328	341	1.07	(0.86	1.34)		107	1.06	(0.74	1.54)		61	1.04	(0.71	1.53)		68	0.73	(0.49	1.10)		53	1.18	(0.79	1.78)		19	1.13	(0.61	2.09)		18	1.63	(0.81	3.26)
52
53	Phenoxy herbicides	duration <=8 years	188	195	1.11	(0.86	1.42)		60	1.12	(0.74	1.69)		31	0.93	(0.59	1.47)		42	0.8	(0.51	1.24)		27	1.1	(0.68	1.79)		13	1.25	(0.62	2.51)		11	1.61	(0.75	3.46)
54	Phenoxy herbicides	duration >8 years	175	192	1.13	(0.87	1.47)		53	0.98	(0.63	1.50)		38	1.2	(0.77	1.87)		33	0.69	(0.42	1.13)		35	1.47	(0.92	2.35)		15	1.67	(0.83	3.39)		11	1.9	(0.86	4.22)
55	Phenoxy herbicides							0.44					0.75					0.38					0.2					0.11					0.15					0.16
56
57	Phenoxy herbicides	lagged (10-year lag) duration <=8 years	166	167	1.05	(0.80	1.37)		56	1.12	(0.73	1.71)		31	1.06	(0.67	1.70)		36	0.74	(0.46	1.19)		21	0.93	(0.55	1.60)		7	0.84	(0.33	2.14)		8	1.37	(0.57	3.28)
58	Phenoxy herbicides	lagged (10-year lag) duration >8 years	158	172	1.11	(0.84	1.46)		51	1.03	(0.66	1.60)		30	1.05	(0.65	1.70)		31	0.71	(0.43	1.19)		31	1.41	(0.86	2.29)		12	1.42	(0.66	3.08)		10	1.97	(0.86	4.52)
59	Phenoxy herbicides							0.56					0.97					0.86					0.28					0.19					0.4					0.13
60
61	Phenoxy herbicides	duration <=8 years	188	195	1.11	(0.86	1.42)		60	1.12	(0.74	1.69)		31	0.93	(0.59	1.47)		42	0.8	(0.51	1.24)		27	1.1	(0.68	1.79)		13	1.25	(0.62	2.51)		11	1.61	(0.75	3.46)
62	Phenoxy herbicides	duration >8 to 25.5 years	105	120	1.22	(0.89	1.67)		35	1.07	(0.65	1.75)		22	1.19	(0.70	2.04)		19	0.68	(0.38	1.22)		25	1.81	(1.06	3.08)		5	1.46	(0.52	4.15)		9	2.53	(1.08	5.93)
63	Phenoxy herbicides	duration >25.5 years	70	72	1.01	(0.69	1.46)		18	0.84	(0.46	1.53)		16	1.2	(0.65	2.23)		14	0.71	(0.36	1.38)		10	1.01	(0.49	2.09)		10	1.78	(0.74	4.27)		2	0.89	(0.20	4.01)
64	Phenoxy herbicides							0.71					0.57					0.42					0.25					0.38					0.15					0.49
65
66	Phenoxy herbicides	lagged (10-year lag) duration <=8 years	166	167	1.05	(0.80	1.37)		56	1.12	(0.73	1.72)		31	1.06	(0.67	1.69)		36	0.74	(0.46	1.18)		21	0.93	(0.54	1.59)		7	0.84	(0.33	2.13)		8	1.35	(0.56	3.23)
67	Phenoxy herbicides	lagged (10-year lag) duration >8 to 21 years	77	88	1.18	(0.84	1.67)		21	0.93	(0.52	1.65)		15	1.06	(0.58	1.97)		16	0.8	(0.43	1.50)		19	1.64	(0.92	2.93)		5	1.45	(0.49	4.32)		7	2.57	(1.03	6.45)
68	Phenoxy herbicides	lagged (10-year lag) duration >21 years	81	84	1.03	(0.72	1.48)		30	1.11	(0.65	1.89)		15	1.03	(0.55	1.96)		15	0.63	(0.33	1.22)		12	1.14	(0.57	2.28)		7	1.39	(0.51	3.76)		3	1.23	(0.34	4.48)
69	Phenoxy herbicides							0.75					0.87					0.89					0.24					0.38					0.43					0.35
70
71	2,4-D	never	7908	7477					1371					1814					1335					1391					836					379
72	2,4-D	ever-use	287	300	1.1	(0.85	1.43)		103	1.14	(0.76	1.70)		51	1.1	(0.70	1.74)		66	0.89	(0.57	1.38)		50	1.44	(0.89	2.32)		9	1.19	(0.43	3.29)		12	0.62	(0.26	1.44)
73
74	2,4-D	>0 to 5 years before diagnosis	47	60	1.53	(0.83	2.84)		11	1.24	(0.46	3.36)		14	1.43	(0.51	4.01)		16	1.54	(0.60	3.97)		14	1.9	(0.64	5.68)
75	2,4-D	>5 to 10 years before diagnosis	70	75	0.76	(0.41	1.41)		16	0.61	(0.24	1.58)		18	1.09	(0.38	3.11)		21	0.92	(0.36	2.38)		16	0.95	(0.30	3.06)
76	2,4-D	>10 to 20 years before diagnosis	129	138	0.97	(0.66	1.43)		39	0.9	(0.52	1.56)		26	0.92	(0.45	1.90)		35	1.14	(0.62	2.11)		25	0.97	(0.46	2.05)
77	2,4-D	>20 years before diagnosis	231	234	1.03	(0.78	1.36)		86	1.16	(0.76	1.75)		39	1.03	(0.62	1.71)		47	0.67	(0.42	1.08)		36	1.04	(0.61	1.78)
78
79	2,4-D	use in 1950s	84	73	0.7	(0.46	1.06)		25	0.79	(0.43	1.46)		17	0.75	(0.37	1.53)		14	0.71	(0.34	1.45)		11	0.64	(0.28	1.45)
80	2,4-D	use in 1960s	119	139	1.57	(1.05	2.35)		47	1.53	(0.87	2.71)		31	3.02	(1.50	6.09)		28	1.32	(0.69	2.53)		22	1.72	(0.79	3.73)
81	2,4-D	use in 1970s	154	168	1.12	(0.76	1.65)		59	1.2	(0.70	2.06)		27	0.87	(0.41	1.81)		35	1.05	(0.56	1.96)		25	0.75	(0.35	1.63)
82	2,4-D	use in 1980s	158	158	0.77	(0.52	1.15)		51	0.64	(0.36	1.14)		24	0.57	(0.26	1.22)		34	0.68	(0.35	1.31)		29	1.45	(0.69	3.06)
83	2,4-D	use in 1990s	104	113	0.93	(0.60	1.44)		35	1.01	(0.53	1.92)		19	0.93	(0.42	2.09)		28	1.33	(0.68	2.60)		19	0.78	(0.34	1.79)
84	2,4-D	use in 2000s or later	43	49	1.32	(0.76	2.28)		15	1.1	(0.50	2.44)		9	1.84	(0.70	4.85)		10	0.79	(0.33	1.91)		9	1.76	(0.65	4.76)
85
86	2,4-D	lagged use (10-year lag)	264	278	1.1	(0.84	1.44)		97	1.16	(0.77	1.74)		48	1.16	(0.73	1.86)		60	0.86	(0.54	1.35)		44	1.35	(0.82	2.22)		9	1.24	(0.45	3.41)		11	0.6	(0.25	1.43)
87
88	2,4-D	duration <=8 years	150	150	1.06	(0.79	1.44)		58	1.2	(0.77	1.88)		21	0.93	(0.53	1.64)		35	0.88	(0.53	1.46)		22	1.19	(0.67	2.12)		3	0.55	(0.13	2.34)		7	0.73	(0.28	1.90)
89	2,4-D	duration >8 years	133	146	1.14	(0.83	1.58)		45	1.06	(0.65	1.74)		29	1.37	(0.79	2.36)		29	0.86	(0.50	1.50)		27	1.68	(0.93	3.01)		6	2.54	(0.68	9.53)		5	0.51	(0.17	1.55)
90	2,4-D							0.45					0.94					0.21					0.69					0.09					0.18					0.27
91
92	2,4-D	lagged (10-year lag) duration <=8 years	139	141	1.06	(0.78	1.44)		54	1.2	(0.76	1.90)		25	1.19	(0.69	2.07)		31	0.81	(0.48	1.37)		18	1.04	(0.56	1.92)		3	0.55	(0.13	2.35)		6	0.63	(0.23	1.76)
93	2,4-D	lagged (10-year lag) duration >8 years	122	135	1.15	(0.83	1.61)		43	1.11	(0.67	1.84)		23	1.18	(0.66	2.11)		28	0.89	(0.51	1.57)		25	1.66	(0.91	3.03)		6	2.79	(0.74	10.5)		5	0.57	(0.19	1.74)
94	2,4-D							0.43					0.85					0.63					0.82					0.1					0.15					0.38
95
96	2,4-D	duration <=8 years	150	150	1.06	(0.79	1.44)		58	1.2	(0.77	1.88)		21	0.93	(0.53	1.64)		35	0.88	(0.53	1.46)		22	1.19	(0.67	2.11)
97	2,4-D	duration >8 to 25.5 years	88	95	1.14	(0.79	1.64)		30	1.02	(0.59	1.75)		18	1.32	(0.70	2.46)		16	0.72	(0.37	1.37)		21	1.96	(1.05	3.67)
98	2,4-D	duration >25.5 years	45	51	1.14	(0.71	1.83)		15	1.18	(0.58	2.41)		11	1.47	(0.67	3.21)		13	1.19	(0.56	2.52)		6	1.06	(0.40	2.81)
99	2,4-D							0.49					0.91					0.21					0.92					0.32
100
101	2,4-D	lagged (10-year lag) duration <=8 years	139	141	1.06	(0.78	1.45)		54	1.21	(0.76	1.92)		25	1.19	(0.69	2.07)		31	0.81	(0.48	1.37)		18	1.02	(0.55	1.90)
102	2,4-D	lagged (10-year lag) duration >8 to 20 years	61	65	1.12	(0.74	1.69)		16	0.82	(0.42	1.59)		11	1.13	(0.54	2.35)		13	0.84	(0.41	1.69)		16	1.94	(0.98	3.83)
103	2,4-D	lagged (10-year lag) duration >20 years	61	70	1.19	(0.78	1.81)		27	1.43	(0.79	2.61)		12	1.23	(0.58	2.59)		15	0.95	(0.47	1.91)		9	1.28	(0.55	2.97)
104	2,4-D							0.42					0.49					0.61					0.92					0.25
105
106	Other phenoxy herbicides	never	8385	7971					1460					1850					1388					1423					1114					383
107	Other phenoxy herbicides	ever-use	88	81	0.85	(0.61	1.19)		14	0.67	(0.36	1.25)		15	0.85	(0.47	1.56)		13	0.8	(0.42	1.52)		18	0.83	(0.46	1.50)		6	0.65	(0.21	1.97)		8	2.71	(1.16	6.33)
108
109	Other phenoxy herbicides	>0 to 5 years before diagnosis	15	19	0.54	(0.16	1.82)							3	0.7	(0.08	6.45)		3	0.57	(0.07	4.92)		6	0.38	(0.06	2.27)		3	1.01	(0.10	9.97)		3	1.32	(0.08	20.7)
110	Other phenoxy herbicides	>5 to 10 years before diagnosis	15	23	2.2	(0.53	9.08)							3	0.63	(0.05	7.84)		4	2.22	(0.18	27.2)		8	4.06	(0.49	33.6)		3	1.71	(0.07	41.1)		3	1.2	(0.04	37.9)
111	Other phenoxy herbicides	>10 to 20 years before diagnosis	26	34	1.18	(0.49	2.83)							7	2.67	(0.71	10.0)		6	2.12	(0.40	11.1)		11	1.53	(0.35	6.59)		3	0.52	(0.04	7.32)		4	1.68	(0.17	17.1)
112	Other phenoxy herbicides	>20 years before diagnosis	77	68	0.75	(0.50	1.12)							12	0.67	(0.31	1.44)		11	0.59	(0.27	1.29)		13	0.46	(0.20	1.05)		5	0.89	(0.20	4.02)		7	2.08	(0.68	6.33)
113
114	Other phenoxy herbicides	use in 1950s	29	22	0.53	(0.27	1.02)																	5	0.63	(0.19	2.04)
115	Other phenoxy herbicides	use in 1960s	40	51	1.59	(0.89	2.84)																	8	0.73	(0.23	2.36)
116	Other phenoxy herbicides	use in 1970s	46	49	0.73	(0.39	1.38)																	10	0.48	(0.13	1.70)
117	Other phenoxy herbicides	use in 1980s	26	36	2.69	(1.06	6.81)																	11	6.51	(1.67	25.4)
118	Other phenoxy herbicides	use in 1990s	20	16	0.32	(0.11	0.94)																	5	0.21	(0.04	1.09)
119	Other phenoxy herbicides	use in 2000s or later	5	3	0.79	(0.15	4.15)																	2	7.02	(0.75	65.7)
120
121	Other phenoxy herbicides	lagged use (10-year lag)	83	76	0.85	(0.60	1.20)		14	0.72	(0.39	1.35)		13	0.77	(0.41	1.47)		13	0.85	(0.45	1.62)		17	0.83	(0.45	1.54)		5	0.59	(0.18	2.00)		7	1.88	(0.70	5.05)
122
123	Other phenoxy herbicides	duration <=6.5 years	50	33	0.63	(0.40	1.00)		7	0.54	(0.23	1.26)		6	0.63	(0.26	1.53)		5	0.48	(0.18	1.25)		6	0.59	(0.24	1.46)							4	2.6	(0.85	7.95)
124	Other phenoxy herbicides	duration >6.5 years	37	46	1.13	(0.71	1.79)		7	0.92	(0.39	2.17)		8	1.05	(0.46	2.38)		8	1.41	(0.61	3.26)		11	1.01	(0.47	2.17)							4	2.94	(0.94	9.23)
125	Other phenoxy herbicides							0.77					0.69					0.98					0.56					0.96										0.05
126
127	Other phenoxy herbicides	lagged (10-year lag) duration <=6 years	49	31	0.62	(0.38	0.99)		7	0.55	(0.24	1.29)		6	0.65	(0.27	1.58)		5	0.5	(0.19	1.30)		6	0.61	(0.24	1.51)							3	2.12	(0.60	7.49)
128	Other phenoxy herbicides	lagged (10-year lag) duration >6 years	33	44	1.2	(0.74	1.94)		7	1.05	(0.44	2.53)		7	0.99	(0.42	2.38)		8	1.57	(0.68	3.66)		10	1	(0.45	2.23)							4	3.24	(1.03	10.2)
129	Other phenoxy herbicides							0.67					0.88					0.86					0.45					0.94										0.04
130
131	Other phenoxy herbicides	duration <=6.5 years	50	33	0.63	(0.40	1.00)		7	0.54	(0.23	1.26)		6	0.63	(0.26	1.53)		5	0.48	(0.18	1.25)		6	0.59	(0.24	1.46)
132	Other phenoxy herbicides	duration >6.5 to 19 years	20	22	1.01	(0.53	1.92)		5	1.09	(0.38	3.13)		4	1.04	(0.34	3.19)		5	1.47	(0.51	4.24)		5	0.93	(0.32	2.69)
133	Other phenoxy herbicides	duration >19 years	17	24	1.26	(0.66	2.39)		2	0.67	(0.15	3.00)		4	1.06	(0.34	3.32)		3	1.32	(0.36	4.83)		6	1.1	(0.40	3.02)
134	Other phenoxy herbicides							0.63					0.53					1.0					0.68					0.94
135
136	Other phenoxy herbicides	lagged (10-year lag) duration <=6 years	49	31	0.62	(0.38	0.99)		7	0.55	(0.24	1.30)		6	0.65	(0.27	1.59)		5	0.5	(0.19	1.30)		6	0.62	(0.25	1.53)
137	Other phenoxy herbicides	lagged (10-year lag) duration >6 to 16 years	18	21	1.06	(0.55	2.06)		5	1.28	(0.44	3.78)		4	1.07	(0.34	3.32)		4	1.31	(0.41	4.17)		5	0.94	(0.32	2.78)
138	Other phenoxy herbicides	lagged (10-year lag) duration >16 years	15	23	1.36	(0.69	2.65)		2	0.74	(0.17	3.38)		3	0.92	(0.26	3.33)		4	2	(0.61	6.50)		5	1.12	(0.38	3.31)
139	Other phenoxy herbicides							0.54					0.69					0.82					0.35					0.97
140
141	Glyphosate	never	8636	8241					1532					1968					1457					1435					1066					437
142	Glyphosate	ever-use	340	345	1.03	(0.83	1.29)		106	0.91	(0.63	1.30)		60	0.96	(0.66	1.42)		91	1.42	(0.98	2.05)		46	0.97	(0.63	1.49)		14	0.74	(0.38	1.46)		18	0.99	(0.50	1.99)
143
144	Glyphosate	>0 to 5 years before diagnosis	144	146	0.85	(0.60	1.20)		34	0.72	(0.41	1.27)		24	0.58	(0.31	1.08)		36	1.08	(0.62	1.90)		27	1.27	(0.67	2.43)		10	0.96	(0.36	2.57)		9	0.68	(0.25	1.89)
145	Glyphosate	>5 to 10 years before diagnosis	162	169	1.14	(0.78	1.67)		46	0.96	(0.54	1.71)		32	1.8	(0.93	3.48)		38	0.86	(0.46	1.61)		27	1.04	(0.48	2.25)		7	1.1	(0.26	4.75)		11	2.02	(0.65	6.31)
146	Glyphosate	>10 to 20 years before diagnosis	187	199	1.08	(0.79	1.49)		62	1.09	(0.68	1.72)		32	0.83	(0.46	1.48)		51	1.3	(0.79	2.14)		31	1.21	(0.64	2.29)		6	0.82	(0.18	3.80)		10	0.8	(0.29	2.20)
147	Glyphosate	>20 years before diagnosis	152	146	0.84	(0.62	1.13)		50	0.79	(0.51	1.21)		23	0.8	(0.46	1.39)		39	0.99	(0.62	1.59)		17	0.67	(0.36	1.26)		6	0.68	(0.20	2.36)		6	0.66	(0.25	1.78)
148
149	Glyphosate	use in 1970s	99	107	1.17	(0.82	1.65)		34	1	(0.60	1.66)		19	1.32	(0.71	2.46)		27	1.21	(0.70	2.09)		13	0.86	(0.42	1.73)		5	1.61	(0.38	6.83)		5	1.68	(0.56	5.11)
150	Glyphosate	use in 1980s	192	178	0.85	(0.63	1.16)		57	0.99	(0.63	1.56)		28	0.64	(0.36	1.13)		45	0.96	(0.58	1.57)		28	1.19	(0.65	2.16)		8	0.36	(0.10	1.30)		6	0.4	(0.14	1.19)
151	Glyphosate	use in 1990s	232	222	0.85	(0.62	1.15)		63	0.71	(0.44	1.14)		41	0.97	(0.57	1.66)		56	1.07	(0.66	1.75)		31	0.71	(0.37	1.34)		11	0.67	(0.23	1.95)		12	0.83	(0.31	2.21)
152	Glyphosate	use in 2000s or later	122	132	1.24	(0.87	1.76)		38	0.99	(0.58	1.69)		23	1.2	(0.64	2.23)		31	0.95	(0.54	1.66)		20	1.57	(0.79	3.13)		6	4.66	(1.17	18.5)		9	1.84	(0.65	5.22)
153
154	Glyphosate	lagged use (10-year lag)	236	262	1.1	(0.85	1.41)		86	0.97	(0.66	1.44)		43	0.98	(0.63	1.53)		67	1.48	(0.98	2.25)		35	1.01	(0.63	1.64)		9	0.72	(0.31	1.72)		13	1.01	(0.46	2.21)
155
156	Glyphosate	duration <=8 years	207	219	1.11	(0.87	1.43)		71	1.04	(0.70	1.53)		38	1.04	(0.67	1.59)		66	1.66	(1.12	2.45)		21	0.77	(0.45	1.32)		7	0.66	(0.27	1.63)		11	1.01	(0.46	2.18)
157	Glyphosate	duration >8 years	125	123	0.93	(0.68	1.28)		35	0.74	(0.45	1.21)		21	0.86	(0.49	1.49)		24	0.97	(0.56	1.67)		24	1.32	(0.76	2.29)		7	0.85	(0.34	2.14)		7	1.01	(0.39	2.61)
158	Glyphosate							0.62					0.2					0.57					0.68					0.28					0.63					0.98
159
160	Glyphosate	lagged (10-year lag) duration <=8 years	138	177	1.27	(0.95	1.68)		60	1.18	(0.77	1.81)		31	1.2	(0.74	1.95)		48	1.8	(1.15	2.82)		19	0.93	(0.52	1.64)		5	0.78	(0.25	2.43)		10	1.27	(0.55	2.92)
161	Glyphosate	lagged (10-year lag) duration >8 years	96	84	0.85	(0.60	1.21)		26	0.69	(0.40	1.19)		12	0.66	(0.33	1.32)		19	1	(0.55	1.83)		15	1.13	(0.59	2.18)		4	0.63	(0.19	2.13)		3	0.6	(0.17	2.21)
162	Glyphosate							0.42					0.18					0.31					0.95					0.75					0.49					0.48
163
164	Glyphosate	duration <=8 years	207	219	1.11	(0.87	1.43)		71	1.04	(0.70	1.53)		38	1.04	(0.67	1.59)		66	1.66	(1.12	2.45)		21	0.77	(0.45	1.31)		7	0.66	(0.27	1.63)		11	1	(0.46	2.18)
165	Glyphosate	duration >8 to 15.5 years	69	68	0.96	(0.65	1.42)		23	0.88	(0.49	1.57)		12	0.92	(0.47	1.84)		12	0.89	(0.44	1.79)		13	1.3	(0.66	2.59)		2	0.8	(0.17	3.66)		5	1.29	(0.44	3.75)
166	Glyphosate	duration >15.5 years	56	55	0.9	(0.59	1.37)		12	0.57	(0.28	1.16)		9	0.78	(0.36	1.69)		12	1.06	(0.52	2.17)		11	1.34	(0.64	2.80)		5	0.85	(0.28	2.60)		2	0.65	(0.14	3.01)
167	Glyphosate							0.54					0.12					0.51					0.64					0.27					0.68					0.83
168
169	Glyphosate	lagged (10-year lag) duration <=8 years	138	177	1.27	(0.95	1.68)		60	1.18	(0.77	1.82)		31	1.21	(0.74	1.96)		48	1.8	(1.14	2.82)		19	0.92	(0.52	1.64)
170	Glyphosate	lagged (10-year lag) duration >8 to 13 years	27	30	1.18	(0.67	2.07)		10	1.03	(0.45	2.33)		2	0.41	(0.09	1.78)		7	1.33	(0.54	3.31)		7	2.25	(0.91	5.60)
171	Glyphosate	lagged (10-year lag) duration >13 years	69	54	0.73	(0.48	1.10)		16	0.57	(0.30	1.08)		10	0.76	(0.36	1.61)		12	0.87	(0.42	1.77)		8	0.77	(0.34	1.75)
172	Glyphosate							0.29					0.12					0.4					0.88					0.89
173
174	Triazine herbicides	never	8050	7591					1491					1802					1370					1366					895					399
175	Triazine herbicides	ever-use	220	222	0.91	(0.70	1.18)		81	1.05	(0.71	1.55)		38	0.88	(0.55	1.39)		42	0.75	(0.48	1.17)		35	0.94	(0.58	1.54)		6	0.75	(0.28	2.01)		12	0.91	(0.40	2.04)
176
177	Triazine herbicides	>0 to 5 years before diagnosis	39	41	0.62	(0.31	1.25)		9	0.56	(0.19	1.64)		9	0.42	(0.14	1.22)		8	0.97	(0.29	3.23)		5	0.27	(0.07	1.03)		3	3.68	(0.09	155.)		3	2.03	(0.22	18.8)
178	Triazine herbicides	>5 to 10 years before diagnosis	55	67	1.48	(0.77	2.83)		18	1.26	(0.51	3.13)		17	2.38	(0.87	6.50)		11	1.13	(0.36	3.58)		11	2.75	(0.88	8.63)		3	0.12	(0000	6.97)		3	0.48	(0.04	5.31)
179	Triazine herbicides	>10 to 20 years before diagnosis	100	112	1.07	(0.69	1.64)		39	1.3	(0.72	2.35)		24	1.26	(0.58	2.75)		20	1.01	(0.48	2.12)		15	0.55	(0.23	1.33)		5	7.48	(0.85	66.0)		5	1.03	(0.26	4.11)
180	Triazine herbicides	>20 years before diagnosis	180	179	0.84	(0.62	1.15)		67	0.87	(0.56	1.36)		30	0.72	(0.41	1.28)		33	0.71	(0.42	1.20)		32	1.46	(0.82	2.60)		3	0.15	(0.02	0.93)		7	0.57	(0.21	1.57)
181
182	Triazine herbicides	use in 1950s	40	33	0.83	(0.46	1.50)		10	0.67	(0.28	1.58)		7	0.92	(0.32	2.61)		7	1.38	(0.48	3.97)		7	0.91	(0.32	2.56)
183	Triazine herbicides	use in 1960s	107	100	0.97	(0.62	1.50)		37	1.05	(0.58	1.90)		18	1.03	(0.46	2.31)		17	0.72	(0.32	1.60)		21	1.36	(0.60	3.05)
184	Triazine herbicides	use in 1970s	147	144	0.98	(0.64	1.50)		54	1.12	(0.62	2.04)		24	0.75	(0.34	1.63)		25	0.96	(0.47	1.95)		25	0.95	(0.42	2.15)
185	Triazine herbicides	use in 1980s	139	135	0.84	(0.53	1.32)		46	0.56	(0.28	1.12)		26	1.14	(0.51	2.56)		22	0.5	(0.22	1.14)		23	1.69	(0.77	3.68)
186	Triazine herbicides	use in 1990s	89	95	1.14	(0.70	1.85)		38	2.01	(1000	4.03)		19	1.07	(0.45	2.54)		19	1.87	(0.77	4.51)		6	0.2	(0.07	0.62)
187	Triazine herbicides	use in 2000s or later	28	30	0.87	(0.46	1.67)		10	0.63	(0.25	1.55)		7	1.13	(0.39	3.29)		6	0.63	(0.21	1.93)		2	1.41	(0.25	7.92)
188
189	Triazine herbicides	lagged use (10-year lag)	201	203	0.89	(0.68	1.17)		76	1.03	(0.69	1.53)		34	0.87	(0.54	1.40)		38	0.73	(0.46	1.16)		33	0.99	(0.60	1.64)		5	0.64	(0.22	1.87)		9	0.67	(0.28	1.61)
190
191	Triazine herbicides	duration <=10 years	114	108	0.86	(0.62	1.20)		40	0.99	(0.61	1.59)		17	0.78	(0.43	1.42)		19	0.61	(0.34	1.08)		18	0.98	(0.54	1.80)		3	1.22	(0.32	4.63)		7	1.03	(0.40	2.69)
192	Triazine herbicides	duration >10 years	105	113	0.95	(0.69	1.32)		41	1.11	(0.70	1.78)		20	0.95	(0.54	1.67)		23	0.93	(0.53	1.61)		17	0.93	(0.50	1.72)		3	0.53	(0.14	2.00)		5	0.79	(0.27	2.27)
193	Triazine herbicides							0.86					0.65					0.93					0.96					0.81					0.36					0.64
194
195	Triazine herbicides	lagged (10-year lag) duration <=10 years	104	103	0.88	(0.63	1.24)		40	1.03	(0.64	1.67)		16	0.8	(0.43	1.49)		19	0.66	(0.37	1.19)		16	0.97	(0.51	1.82)		3	1.05	(0.28	4.03)		4	0.56	(0.18	1.78)
196	Triazine herbicides	lagged (10-year lag) duration >10 years	96	100	0.92	(0.65	1.29)		36	1.02	(0.63	1.66)		18	0.94	(0.52	1.71)		19	0.82	(0.45	1.47)		17	1.05	(0.56	1.97)		2	0.4	(0.08	1.93)		5	0.8	(0.28	2.33)
197	Triazine herbicides							0.64					0.96					0.85					0.58					0.88					0.29					0.66
198
199	Triazine herbicides	duration <=10 years	114	108	0.86	(0.62	1.19)		40	0.98	(0.61	1.57)		17	0.78	(0.43	1.42)		19	0.6	(0.34	1.07)		18	0.97	(0.53	1.78)							7	1.02	(0.39	2.67)
200	Triazine herbicides	duration >10 to 22 years	48	67	1.25	(0.83	1.90)		27	1.65	(0.94	2.90)		8	0.83	(0.37	1.87)		15	1.42	(0.73	2.74)		11	1.27	(0.61	2.67)							3	1.04	(0.29	3.78)
201	Triazine herbicides	duration >22 years	57	46	0.7	(0.45	1.08)		14	0.67	(0.34	1.31)		12	1.05	(0.52	2.12)		8	0.55	(0.24	1.24)		6	0.61	(0.24	1.53)							2	0.58	(0.13	2.69)
202	Triazine herbicides							0.38					0.7					0.95					0.48					0.5										0.53
203
204	Triazine herbicides	lagged (10-year lag) duration <=10 years	104	103	0.88	(0.63	1.23)		40	1.02	(0.63	1.65)		16	0.81	(0.44	1.51)		19	0.66	(0.37	1.18)		16	0.96	(0.51	1.81)
205	Triazine herbicides	lagged (10-year lag) duration >10 to 18 years	43	54	1.12	(0.72	1.75)		23	1.52	(0.84	2.76)		5	0.59	(0.22	1.56)		11	1.15	(0.55	2.40)		10	1.31	(0.60	2.88)
206	Triazine herbicides	lagged (10-year lag) duration >18 years	53	46	0.75	(0.48	1.17)		13	0.63	(0.32	1.26)		13	1.26	(0.62	2.53)		8	0.58	(0.25	1.32)		7	0.82	(0.34	1.97)
207	Triazine herbicides							0.41					0.58					0.85					0.39					0.92
208
209	Atrazine	never	5183	5235					930					1195					1076					967										250
210	Atrazine	ever-use	178	174	0.85	(0.63	1.14)		67	0.93	(0.61	1.43)		26	0.68	(0.40	1.17)		36	0.68	(0.42	1.10)		27	0.9	(0.52	1.56)							9	0.85	(0.33	2.15)
211
212	Atrazine	>0 to 5 years before diagnosis	27	26	0.54	(0.24	1.23)		4	0.31	(0.08	1.24)		6	0.4	(0.11	1.49)		6	0.71	(0.18	2.70)		5	0.45	(0.11	1.97)							2	1.37	(0.11	17.0)
213	Atrazine	>5 to 10 years before diagnosis	39	45	1.3	(0.62	2.74)		11	1.1	(0.40	3.03)		11	2.48	(0.75	8.27)		9	1.11	(0.32	3.79)		9	1.98	(0.53	7.44)							2	0.32	(0.02	4.60)
214	Atrazine	>10 to 20 years before diagnosis	72	82	1.2	(0.74	1.94)		29	1.35	(0.71	2.58)		15	1.21	(0.47	3.09)		17	1.27	(0.57	2.84)		12	0.69	(0.26	1.85)							5	2.36	(0.58	9.60)
215	Atrazine	>20 years before diagnosis	146	143	0.81	(0.58	1.15)		58	0.87	(0.54	1.40)		20	0.55	(0.28	1.08)		27	0.57	(0.32	1.02)		25	1.33	(0.69	2.56)							6	0.51	(0.16	1.62)
216
217	Atrazine	use in 1950s	25	16	0.63	(0.29	1.34)		6	0.63	(0.22	1.83)		2	0.33	(0.06	1.68)		5	1.35	(0.39	4.72)		2	0.42	(0.08	2.10)
218	Atrazine	use in 1960s	81	70	1	(0.62	1.62)		28	0.99	(0.52	1.89)		11	1.23	(0.50	3.04)		12	0.65	(0.26	1.62)		15	1.53	(0.65	3.63)
219	Atrazine	use in 1970s	117	111	0.95	(0.60	1.52)		44	1.04	(0.56	1.96)		16	0.68	(0.28	1.66)		19	0.77	(0.36	1.68)		20	0.98	(0.40	2.41)
220	Atrazine	use in 1980s	109	103	0.84	(0.51	1.38)		37	0.71	(0.35	1.44)		17	0.74	(0.28	1.95)		18	0.53	(0.21	1.28)		18	1.4	(0.58	3.37)
221	Atrazine	use in 1990s	65	69	0.97	(0.56	1.67)		27	1.33	(0.63	2.82)		14	1.39	(0.49	3.96)		16	1.63	(0.62	4.31)		6	0.31	(0.10	0.99)
222	Atrazine	use in 2000s or later	17	26	1.41	(0.66	3.03)		8	0.85	(0.30	2.38)		6	2.03	(0.60	6.88)		7	1.2	(0.38	3.84)		2	1.87	(0.32	10.7)
223
224	Atrazine	lagged use (10-year lag)	160	160	0.86	(0.63	1.16)		64	0.95	(0.62	1.48)		23	0.67	(0.38	1.17)		32	0.66	(0.40	1.09)		25	0.94	(0.54	1.67)							8	0.83	(0.32	2.17)
225
226	Atrazine	duration <=8 years	96	86	0.77	(0.53	1.11)		36	0.88	(0.53	1.46)		10	0.51	(0.24	1.07)		17	0.56	(0.30	1.03)		12	0.78	(0.38	1.59)							6	1.02	(0.35	2.94)
227	Atrazine	duration >8 years	80	87	0.95	(0.66	1.37)		31	1	(0.59	1.70)		15	0.84	(0.44	1.61)		19	0.85	(0.46	1.55)		15	1.07	(0.55	2.09)							3	0.64	(0.17	2.42)
228	Atrazine							0.88					0.96					0.7					0.71					0.79										0.51
229
230	Atrazine	lagged (10-year lag) duration <=8 years	84	84	0.85	(0.58	1.24)		36	0.97	(0.58	1.62)		11	0.63	(0.30	1.30)		17	0.63	(0.34	1.18)		10	0.76	(0.35	1.64)							5	0.93	(0.30	2.84)
231	Atrazine	lagged (10-year lag) duration >8 years	74	76	0.9	(0.61	1.32)		28	0.95	(0.55	1.65)		12	0.73	(0.36	1.48)		15	0.71	(0.37	1.36)		15	1.19	(0.60	2.35)							3	0.72	(0.19	2.73)
232	Atrazine							0.58					0.85					0.38					0.33					0.6										0.61
233
234	Atrazine	duration <=8 years	96	86	0.77	(0.53	1.11)		36	0.86	(0.52	1.43)		10	0.5	(0.24	1.07)		17	0.55	(0.30	1.02)		12	0.77	(0.38	1.58)
235	Atrazine	duration >8 to 15.5 years	32	48	1.4	(0.85	2.30)		22	1.77	(0.94	3.35)		6	0.93	(0.37	2.38)		12	1.47	(0.70	3.09)		7	1.33	(0.54	3.27)
236	Atrazine	duration >15.5 years	48	39	0.66	(0.41	1.06)		9	0.46	(0.21	1.03)		9	0.76	(0.34	1.70)		7	0.46	(0.19	1.11)		8	0.88	(0.37	2.08)
237	Atrazine							0.46					0.44					0.69					0.39					0.92
238
239	Atrazine	lagged (10-year lag) duration <=8 years	84	84	0.85	(0.58	1.23)		36	0.95	(0.57	1.60)		11	0.63	(0.30	1.30)		17	0.63	(0.34	1.17)		10	0.75	(0.35	1.61)
240	Atrazine	lagged (10-year lag) duration >8 to 15.5 years	32	43	1.22	(0.73	2.03)		20	1.55	(0.81	2.99)		4	0.61	(0.20	1.84)		8	0.95	(0.41	2.23)		10	1.76	(0.77	4.00)
241	Atrazine	lagged (10-year lag) duration >15.5 years	42	33	0.66	(0.40	1.10)		8	0.48	(0.21	1.10)		8	0.8	(0.35	1.88)		7	0.54	(0.22	1.30)		5	0.71	(0.25	1.97)
242	Atrazine							0.33					0.38					0.48					0.26					0.91
243
244	Amide herbicides	never	5266	5269					1034					1306					1132					1035										270
245	Amide herbicides	ever-use	171	153	0.74	(0.55	1.00)		61	0.85	(0.56	1.31)		22	0.58	(0.33	1.00)		30	0.59	(0.36	0.99)		19	0.61	(0.34	1.10)							10	1.14	(0.46	2.82)
246
247	Amide herbicides	>0 to 5 years before diagnosis	33	30	0.48	(0.21	1.09)		7	0.31	(0.09	1.07)		7	0.82	(0.20	3.30)		6	0.43	(0.11	1.65)		4	0.41	(0.08	2.17)
248	Amide herbicides	>5 to 10 years before diagnosis	37	43	2.37	(1.04	5.42)		14	4.33	(1.40	13.3)		8	1.37	(0.31	6.10)		10	3.48	(0.96	12.6)		5	1.24	(0.24	6.36)
249	Amide herbicides	>10 to 20 years before diagnosis	88	77	0.72	(0.44	1.18)		26	0.55	(0.27	1.10)		13	0.95	(0.37	2.44)		16	0.58	(0.25	1.36)		12	1.6	(0.63	4.11)
250	Amide herbicides	>20 years before diagnosis	137	122	0.8	(0.56	1.15)		49	0.9	(0.55	1.47)		15	0.51	(0.25	1.05)		28	0.82	(0.46	1.45)		14	0.46	(0.21	1.03)
251
252	Amide herbicides	use in 1960s	53	46	0.93	(0.53	1.63)		16	0.75	(0.34	1.62)		6	0.95	(0.29	3.08)		12	1.1	(0.45	2.68)		6	1.35	(0.37	4.85)
253	Amide herbicides	use in 1970s	125	108	1.08	(0.66	1.77)		44	1.5	(0.77	2.92)		13	0.63	(0.23	1.70)		27	1.19	(0.54	2.61)		11	0.61	(0.20	1.92)
254	Amide herbicides	use in 1980s	126	93	0.5	(0.31	0.82)		31	0.32	(0.15	0.65)		15	0.66	(0.26	1.67)		21	0.55	(0.25	1.22)		11	0.4	(0.13	1.19)
255	Amide herbicides	use in 1990s	71	65	1.09	(0.63	1.90)		24	1.43	(0.64	3.17)		11	1.06	(0.38	2.97)		12	0.8	(0.31	2.11)		10	1.79	(0.57	5.59)
256	Amide herbicides	use in 2000s or later	24	25	1.27	(0.62	2.58)		10	1.33	(0.50	3.51)		4	1.19	(0.32	4.48)		5	1.21	(0.36	4.09)		3	1.1	(0.26	4.74)
257
258	Amide herbicides	lagged use (10-year lag)	158	141	0.74	(0.54	1.00)		56	0.81	(0.52	1.25)		20	0.58	(0.33	1.03)		30	0.63	(0.38	1.06)		16	0.57	(0.31	1.07)							9	1.11	(0.43	2.85)
259
260	Amide herbicides	duration <=8 years	92	94	0.86	(0.60	1.24)		43	1.11	(0.68	1.82)		12	0.65	(0.33	1.31)		16	0.57	(0.31	1.07)		9	0.55	(0.25	1.20)
261	Amide herbicides	duration >8 years	77	56	0.59	(0.40	0.89)		17	0.54	(0.29	1.00)		9	0.47	(0.22	1.01)		14	0.65	(0.34	1.27)		9	0.62	(0.28	1.34)
262	Amide herbicides							0.01					0.05					0.05					0.2					0.2
263
264	Amide herbicides	lagged (10-year lag) duration <=8 years	86	89	0.86	(0.59	1.24)		42	1.1	(0.67	1.80)		12	0.69	(0.34	1.38)		16	0.6	(0.32	1.13)		7	0.48	(0.20	1.12)
265	Amide herbicides	lagged (10-year lag) duration >8 years	70	51	0.6	(0.39	0.91)		14	0.47	(0.24	0.91)		8	0.49	(0.22	1.09)		14	0.71	(0.36	1.39)		8	0.62	(0.28	1.42)
266	Amide herbicides							0.02					0.03					0.06					0.26					0.19
267
268	Amide herbicides	duration <=8 years	92	94	0.86	(0.60	1.23)		43	1.11	(0.68	1.81)		12	0.65	(0.32	1.29)		16	0.56	(0.30	1.06)		9	0.55	(0.25	1.20)
269	Amide herbicides	duration >8 to 15.5 years	47	24	0.41	(0.24	0.72)		10	0.45	(0.21	0.98)		3	0.27	(0.08	0.92)		3	0.22	(0.07	0.76)		5	0.56	(0.21	1.52)
270	Amide herbicides	duration >15.5 years	30	32	0.86	(0.50	1.48)		7	0.67	(0.27	1.62)		6	0.75	(0.29	1.91)		11	1.32	(0.61	2.87)		4	0.68	(0.23	2.08)
271	Amide herbicides							0.06					0.08					0.13					0.66					0.28
272
273	Amide herbicides	lagged (10-year lag) duration <=8 years	86	89	0.86	(0.59	1.24)		42	1.1	(0.67	1.80)		12	0.68	(0.34	1.37)		16	0.6	(0.32	1.13)		7	0.48	(0.20	1.12)
274	Amide herbicides	lagged (10-year lag) duration >8 to 15.5 years	47	25	0.44	(0.25	0.75)		8	0.38	(0.17	0.88)		4	0.38	(0.13	1.12)		5	0.39	(0.14	1.05)		4	0.42	(0.14	1.25)
275	Amide herbicides	lagged (10-year lag) duration >15.5 years	23	26	0.92	(0.50	1.68)		6	0.65	(0.25	1.69)		4	0.68	(0.22	2.10)		9	1.31	(0.56	3.07)		4	1.12	(0.36	3.49)
276	Amide herbicides							0.04					0.04					0.09					0.47					0.3
277
278	Alachlor	never	4181	4207					893					976					838					848										227
279	Alachlor	ever-use	126	123	0.84	(0.60	1.18)		53	0.96	(0.60	1.51)		16	0.58	(0.30	1.09)		25	0.63	(0.36	1.10)		15	0.79	(0.40	1.55)							8	1.47	(0.53	4.12)
280
281	Alachlor	>0 to 5 years before diagnosis	16	13	0.2	(0.05	0.86)		3	0.08	(0.01	0.55)		4	1.55	(0.13	18.5)		2	0.16	(0.02	1.66)		3	0.22	(0.03	1.87)
282	Alachlor	>5 to 10 years before diagnosis	17	24	4.74	(1.24	18.1)		9	10	(2.02	49.6)		4	1.22	(0.09	16.1)		4	3.72	(0.54	25.6)		5	5.54	(0.76	40.0)
283	Alachlor	>10 to 20 years before diagnosis	54	54	0.83	(0.48	1.44)		22	0.74	(0.36	1.55)		6	0.61	(0.19	1.98)		12	0.9	(0.38	2.12)		9	1.58	(0.52	4.80)
284	Alachlor	>20 years before diagnosis	106	102	0.82	(0.55	1.22)		45	0.96	(0.57	1.61)		11	0.55	(0.24	1.24)		23	0.73	(0.39	1.36)		12	0.52	(0.21	1.28)
285
286	Alachlor	use in 1960s	35	29	0.83	(0.43	1.60)		11	0.65	(0.27	1.58)		3	0.63	(0.14	2.82)							4	1.39	(0.33	5.79)
287	Alachlor	use in 1970s	94	87	1.12	(0.66	1.91)		39	1.46	(0.73	2.91)		9	0.79	(0.26	2.38)							9	0.58	(0.17	1.92)
288	Alachlor	use in 1980s	89	72	0.53	(0.31	0.92)		28	0.38	(0.17	0.83)		8	0.4	(0.13	1.28)							10	0.62	(0.18	2.11)
289	Alachlor	use in 1990s	43	45	1.32	(0.68	2.59)		20	1.74	(0.70	4.30)		6	1.09	(0.25	4.72)							8	1.84	(0.47	7.25)
290	Alachlor	use in 2000s or later	12	14	1.11	(0.43	2.88)		7	1.27	(0.39	4.14)		3	2.59	(0.45	14.8)							3	1.99	(0.38	10.3)
291
292	Alachlor	lagged use (10-year lag)	117	113	0.83	(0.59	1.17)		49	0.92	(0.58	1.47)		12	0.47	(0.23	0.94)		25	0.67	(0.39	1.17)		13	0.77	(0.38	1.56)							8	1.59	(0.56	4.47)
293
294	Alachlor	duration <=8 years	79	84	0.92	(0.62	1.35)		39	1.11	(0.67	1.86)		10	0.62	(0.29	1.33)		16	0.64	(0.33	1.21)		7	0.58	(0.24	1.40)
295	Alachlor	duration >8 years	44	36	0.7	(0.43	1.16)		13	0.69	(0.34	1.39)		5	0.46	(0.17	1.24)		9	0.67	(0.30	1.48)		7	1.07	(0.44	2.63)
296	Alachlor							0.19					0.48					0.07					0.16					0.71
297
298	Alachlor	lagged (10-year lag) duration <=8 years	75	79	0.89	(0.60	1.33)		37	1.07	(0.63	1.79)		8	0.51	(0.22	1.17)		16	0.65	(0.34	1.25)		6	0.55	(0.22	1.41)
299	Alachlor	lagged (10-year lag) duration >8 years	40	33	0.72	(0.43	1.22)		12	0.69	(0.34	1.44)		4	0.42	(0.14	1.25)		9	0.75	(0.33	1.67)		6	1.04	(0.40	2.70)
300	Alachlor							0.22					0.46					0.04					0.27					0.72
301
302	Alachlor	duration <=8 years	79	84	0.91	(0.62	1.35)		39	1.11	(0.67	1.86)		10	0.61	(0.28	1.32)		16	0.63	(0.33	1.21)		7	0.58	(0.24	1.40)
303	Alachlor	duration >8 to 15.5 years	29	18	0.52	(0.27	1.00)		8	0.55	(0.23	1.32)		2	0.3	(0.07	1.35)		4	0.45	(0.15	1.37)		3	0.65	(0.18	2.32)
304	Alachlor	duration >15.5 years	15	18	1.04	(0.50	2.15)		5	0.96	(0.33	2.79)		3	0.7	(0.19	2.57)		5	1.05	(0.36	3.09)		4	1.93	(0.59	6.29)
305	Alachlor							0.34					0.57					0.13					0.33					0.89
306
307	Alachlor	lagged (10-year lag) duration <=8 years	75	79	0.89	(0.60	1.33)		37	1.06	(0.63	1.79)							16	0.65	(0.34	1.25)		6	0.56	(0.22	1.42)
308	Alachlor	lagged (10-year lag) duration >8 to 15.5 years	28	15	0.46	(0.23	0.91)		7	0.51	(0.21	1.29)							4	0.49	(0.16	1.52)		2	0.44	(0.10	1.99)
309	Alachlor	lagged (10-year lag) duration >15.5 years	12	18	1.31	(0.61	2.85)		5	1.11	(0.37	3.32)							5	1.28	(0.42	3.86)		4	2.68	(0.80	8.97)
310	Alachlor							0.37					0.55										0.42					0.94
311
312	Trifluralin	never	5919	6052					1016					1388					1229					1053					742					295
313	Trifluralin	ever-use	148	130	0.75	(0.55	1.00)		47	0.85	(0.55	1.32)		21	0.7	(0.41	1.21)		19	0.41	(0.24	0.72)		21	0.81	(0.46	1.41)		5	1.07	(0.38	3.05)		8	0.96	(0.39	2.37)
314
315	Trifluralin	>0 to 5 years before diagnosis	36	26	0.52	(0.23	1.14)		2	0.25	(0.04	1.65)		7	0.33	(0.09	1.24)		4	1.07	(0.24	4.68)		5	0.46	(0.11	1.98)		3	1.16	(0.22	6.16)		2	0.53	(0.05	5.73)
316	Trifluralin	>5 to 10 years before diagnosis	39	31	1	(0.44	2.26)		4	0.61	(0.14	2.71)		10	3.53	(0.95	13.0)		3	0.52	(0.09	2.88)		6	1.2	(0.26	5.44)		2	0.21	(0.02	3.00)		2	0.79	(0.06	10.2)
317	Trifluralin	>10 to 20 years before diagnosis	67	64	1.23	(0.75	2.02)		23	1.55	(0.80	2.99)		11	0.95	(0.35	2.56)		7	0.73	(0.27	1.93)		9	0.96	(0.34	2.67)		3	5.99	(0.44	81.9)		4	1.64	(0.38	7.14)
318	Trifluralin	>20 years before diagnosis	107	95	0.75	(0.51	1.09)		39	0.88	(0.52	1.47)		12	0.47	(0.21	1.05)		14	0.51	(0.26	1.02)		15	0.87	(0.41	1.85)		2	0.45	(0.04	5.09)		5	0.78	(0.23	2.66)
319
320	Trifluralin	use in 1960s	44	35	0.78	(0.45	1.33)		11	0.73	(0.33	1.61)		4	0.5	(0.15	1.66)		6	0.78	(0.29	2.11)
321	Trifluralin	use in 1970s	88	76	1.07	(0.66	1.73)		28	1.08	(0.56	2.10)		10	0.93	(0.35	2.46)		11	0.81	(0.34	1.93)
322	Trifluralin	use in 1980s	94	77	0.69	(0.41	1.16)		27	0.72	(0.35	1.50)		12	0.45	(0.16	1.27)		10	0.57	(0.22	1.47)
323	Trifluralin	use in 1990s	65	58	1	(0.58	1.73)		18	1.21	(0.55	2.67)		14	2.15	(0.86	5.40)		6	0.45	(0.13	1.54)
324	Trifluralin	use in 2000s or later	17	12	0.78	(0.33	1.86)		3	0.4	(0.10	1.64)		3	0.9	(0.22	3.75)		3	1.78	(0.35	8.94)
325
326	Trifluralin	lagged use (10-year lag)	127	114	0.78	(0.57	1.07)		47	0.96	(0.61	1.50)		15	0.6	(0.32	1.11)		15	0.37	(0.20	0.69)		18	0.85	(0.47	1.55)		3	1.18	(0.31	4.50)		7	1.1	(0.42	2.88)
327
328	Trifluralin	duration <=8 years	87	76	0.77	(0.53	1.11)		34	0.99	(0.60	1.63)		8	0.49	(0.22	1.08)		11	0.4	(0.20	0.79)		12	0.89	(0.44	1.80)		2	1.17	(0.25	5.54)		5	1.05	(0.36	3.07)
329	Trifluralin	duration >8 years	60	50	0.67	(0.44	1.02)		13	0.63	(0.32	1.25)		11	0.81	(0.40	1.64)		7	0.39	(0.17	0.91)		8	0.65	(0.29	1.45)		3	0.96	(0.26	3.61)		3	0.83	(0.23	3.01)
330	Trifluralin							0.05					0.19					0.49					0.02					0.29					0.97					0.78
331
332	Trifluralin	lagged (10-year lag) duration <=8 years	76	71	0.84	(0.57	1.23)		35	1.16	(0.70	1.92)		5	0.35	(0.13	0.92)		9	0.38	(0.18	0.80)		12	1.07	(0.52	2.18)							5	1.36	(0.45	4.09)
333	Trifluralin	lagged (10-year lag) duration >8 years	50	41	0.68	(0.43	1.07)		12	0.67	(0.33	1.35)		9	0.81	(0.37	1.75)		6	0.38	(0.15	0.94)		5	0.52	(0.20	1.39)							2	0.75	(0.16	3.46)
334	Trifluralin							0.09					0.3					0.54					0.02					0.21										0.77
335
336	Trifluralin	duration <=8 years	87	76	0.77	(0.53	1.11)		34	0.99	(0.60	1.64)		8	0.5	(0.22	1.10)		11	0.4	(0.20	0.79)		12	0.91	(0.45	1.82)
337	Trifluralin	duration >8 to 15.5 years	31	29	0.81	(0.47	1.40)		9	0.85	(0.38	1.92)		7	1.22	(0.50	2.95)		3	0.33	(0.10	1.12)		6	1.08	(0.42	2.77)
338	Trifluralin	duration >15.5 years	29	21	0.54	(0.30	0.97)		4	0.41	(0.13	1.24)		4	0.5	(0.17	1.48)		4	0.47	(0.15	1.41)		2	0.29	(0.07	1.27)
339	Trifluralin							0.04					0.13					0.36					0.03					0.17
340
341	Trifluralin	lagged (10-year lag) duration <=8 years	76	71	0.84	(0.57	1.23)		35	1.16	(0.70	1.92)		5	0.35	(0.13	0.93)		9	0.38	(0.18	0.80)		12	1.07	(0.52	2.18)
342	Trifluralin	lagged (10-year lag) duration >8 to 15.5 years	28	23	0.71	(0.39	1.28)		8	0.77	(0.32	1.82)		5	0.96	(0.35	2.65)		4	0.46	(0.15	1.38)		3	0.57	(0.16	1.97)
343	Trifluralin	lagged (10-year lag) duration >15.5 years	22	18	0.64	(0.33	1.23)		4	0.54	(0.17	1.65)		4	0.67	(0.22	2.05)		2	0.29	(0.07	1.30)		2	0.47	(0.11	2.09)
344	Trifluralin							0.09					0.24					0.54					0.03					0.21
345
346	Dicamba	never	5602	5657					948					1337					1126					1076										254
347	Dicamba	ever-use	131	120	0.79	(0.57	1.10)		49	0.87	(0.55	1.38)		16	0.6	(0.32	1.14)		25	0.64	(0.37	1.10)		18	0.92	(0.49	1.74)							6	0.78	(0.27	2.22)
348
349	Dicamba	>0 to 5 years before diagnosis	22	24	0.59	(0.22	1.58)		6	0.32	(0.08	1.25)		7	1.17	(0.22	6.37)		5	1.3	(0.20	8.69)		3	0.25	(0.05	1.38)
350	Dicamba	>5 to 10 years before diagnosis	33	39	1.71	(0.70	4.19)		13	2.77	(0.88	8.79)		9	1.89	(0.34	10.5)		6	0.62	(0.10	3.81)		7	2.98	(0.68	13.0)
351	Dicamba	>10 to 20 years before diagnosis	64	65	1.09	(0.63	1.88)		22	0.8	(0.38	1.70)		11	1.13	(0.37	3.39)		13	1.17	(0.49	2.81)		11	1.3	(0.43	3.99)
352	Dicamba	>20 years before diagnosis	105	81	0.6	(0.40	0.90)		36	0.77	(0.45	1.31)		9	0.33	(0.14	0.78)		17	0.56	(0.29	1.09)		12	0.62	(0.27	1.42)
353
354	Dicamba	use in 1960s	35	25	1	(0.51	1.98)		9	1.19	(0.45	3.11)		4	1.66	(0.36	7.71)		6	0.91	(0.29	2.88)		5	1.02	(0.29	3.61)
355	Dicamba	use in 1970s	89	65	0.68	(0.40	1.17)		25	0.59	(0.28	1.23)		7	0.27	(0.08	0.99)		15	0.86	(0.36	2.07)		12	1.31	(0.46	3.71)
356	Dicamba	use in 1980s	90	75	0.8	(0.47	1.37)		30	0.96	(0.47	1.97)		12	1.08	(0.41	2.85)		14	0.47	(0.18	1.19)		10	0.61	(0.20	1.81)
357	Dicamba	use in 1990s	58	60	1.26	(0.67	2.37)		22	1.14	(0.49	2.64)		10	1.01	(0.28	3.59)		13	2.04	(0.73	5.67)		7	0.73	(0.18	2.93)
358	Dicamba	use in 2000s or later	22	26	1.01	(0.47	2.21)		9	0.89	(0.31	2.57)		6	2	(0.50	8.04)		4	0.5	(0.13	1.90)		4	2.27	(0.47	10.9)
359
360	Dicamba	lagged use (10-year lag)	120	106	0.77	(0.54	1.08)		44	0.86	(0.53	1.38)		14	0.58	(0.30	1.13)		21	0.59	(0.33	1.04)		16	0.91	(0.47	1.75)							5	0.7	(0.23	2.14)
361
362	Dicamba	duration <=8 years	75	71	0.79	(0.53	1.18)		35	1.04	(0.61	1.76)		7	0.46	(0.19	1.08)		13	0.55	(0.28	1.08)		10	0.9	(0.41	1.96)							3	0.62	(0.16	2.35)
363	Dicamba	duration >8 years	54	46	0.77	(0.49	1.21)		13	0.61	(0.30	1.22)		8	0.76	(0.33	1.74)		11	0.76	(0.36	1.59)		8	1	(0.43	2.33)							3	1.08	(0.28	4.15)
364	Dicamba							0.25					0.16					0.48					0.45					1.0										0.92
365
366	Dicamba	lagged (10-year lag) duration <=8 years	68	66	0.82	(0.54	1.23)		31	1.01	(0.59	1.74)		8	0.58	(0.26	1.34)		12	0.56	(0.27	1.13)		10	1	(0.46	2.19)							2	0.44	(0.09	2.08)
367	Dicamba	lagged (10-year lag) duration >8 years	51	39	0.7	(0.44	1.13)		12	0.61	(0.30	1.24)		6	0.6	(0.24	1.53)		9	0.66	(0.30	1.46)		6	0.82	(0.32	2.10)							3	1.24	(0.32	4.80)
368	Dicamba							0.14					0.18					0.26					0.28					0.68										0.77
369
370	Dicamba	duration <=8 years	75	71	0.79	(0.53	1.18)		35	1.04	(0.61	1.76)		7	0.45	(0.19	1.08)		13	0.55	(0.28	1.08)		10	0.9	(0.41	1.97)
371	Dicamba	duration >8 to 15.5 years	27	26	0.89	(0.49	1.61)		9	0.75	(0.33	1.73)		3	0.61	(0.17	2.15)		5	0.68	(0.24	1.89)		5	1.43	(0.51	4.06)
372	Dicamba	duration >15.5 years	27	20	0.65	(0.35	1.22)		4	0.45	(0.15	1.37)		5	0.86	(0.31	2.44)		6	0.85	(0.32	2.24)		3	0.64	(0.18	2.29)
373	Dicamba							0.21					0.12					0.63					0.59					0.79
374
375	Dicamba	lagged (10-year lag) duration <=8 years	68	66	0.82	(0.54	1.24)		31	1.01	(0.59	1.75)		8	0.59	(0.26	1.34)		12	0.56	(0.27	1.13)		10	1	(0.46	2.19)
376	Dicamba	lagged (10-year lag) duration >8 to 15.5 years	32	21	0.61	(0.33	1.10)		8	0.63	(0.27	1.48)		2	0.33	(0.07	1.43)		3	0.38	(0.11	1.31)		4	0.78	(0.25	2.39)
377	Dicamba	lagged (10-year lag) duration >15.5 years	19	18	0.87	(0.43	1.73)		4	0.57	(0.18	1.78)		4	1.1	(0.34	3.54)		6	1.1	(0.40	2.99)		2	0.89	(0.19	4.09)
378	Dicamba							0.24					0.18					0.48					0.55					0.72
379
380	Pendimethalin	never	4250	4272					921					982					855					857										230
381	Pendimethalin	ever-use	57	58	0.94	(0.61	1.44)		25	1.11	(0.63	1.94)		10	1.03	(0.48	2.21)		8	0.48	(0.21	1.07)		6	0.67	(0.27	1.70)							5	1.92	(0.61	6.04)
382
383	Pendimethalin	>0 to 5 years before diagnosis	6	10	1.76	(0.44	7.03)		4	3.05	(0.42	22.1)												2	1.82	(0.18	18.1)
384	Pendimethalin	>5 to 10 years before diagnosis	11	14	0.88	(0.26	2.92)		6	0.67	(0.13	3.55)												2	1.88	(0.17	20.9)
385	Pendimethalin	>10 to 20 years before diagnosis	34	31	0.8	(0.43	1.50)		14	0.93	(0.41	2.09)												2	0.27	(0.04	1.70)
386	Pendimethalin	>20 years before diagnosis	31	33	0.95	(0.53	1.70)		16	1.13	(0.54	2.34)												2	0.57	(0.12	2.61)
387
388	Pendimethalin	use in 1970s	18	22	1.22	(0.58	2.56)		9	1.24	(0.48	3.23)
389	Pendimethalin	use in 1980s	41	39	0.93	(0.50	1.72)		18	1.15	(0.53	2.51)
390	Pendimethalin	use in 1990s	26	24	0.63	(0.29	1.38)		11	0.63	(0.22	1.84)
391	Pendimethalin	use in 2000s or later	4	10	3.05	(0.77	12.0)		5	3.58	(0.66	19.4)
392
393	Pendimethalin	lagged use (10-year lag)	51	51	0.89	(0.57	1.40)		23	1.09	(0.61	1.95)		8	0.9	(0.39	2.08)		8	0.52	(0.23	1.17)		4	0.48	(0.16	1.44)							4	1.62	(0.47	5.61)
394
395	Pendimethalin	duration <=4 years	33	23	0.63	(0.35	1.14)		11	0.82	(0.38	1.76)		3	0.52	(0.15	1.81)		4	0.4	(0.14	1.21)
396	Pendimethalin	duration >4 years	24	31	1.16	(0.64	2.07)		14	1.44	(0.69	3.01)		5	1.19	(0.42	3.35)		4	0.57	(0.19	1.73)
397	Pendimethalin							0.97					0.47					0.96					0.14
398
399	Pendimethalin	lagged (10-year lag) duration <=4 years	28	23	0.72	(0.39	1.34)		11	0.9	(0.41	1.96)		3	0.62	(0.18	2.20)		5	0.57	(0.21	1.57)
400	Pendimethalin	lagged (10-year lag) duration >4 years	23	27	1.05	(0.57	1.93)		12	1.31	(0.60	2.84)		5	1.23	(0.43	3.49)		3	0.45	(0.13	1.56)
401	Pendimethalin							0.85					0.59					0.91					0.13
402
403	Pendimethalin	duration <=4 years	33	23	0.63	(0.35	1.14)		11	0.82	(0.38	1.76)		3	0.52	(0.15	1.80)
404	Pendimethalin	duration >4 to 8 years	19	21	1.06	(0.54	2.07)		10	1.28	(0.56	2.95)		3	1.01	(0.28	3.63)
405	Pendimethalin	duration >8 years	5	10	1.5	(0.48	4.65)		4	2.03	(0.48	8.59)		2	1.7	(0.31	9.37)
406	Pendimethalin							0.71					0.33					0.74
407
408	Pendimethalin	lagged (10-year lag) duration <=4 years	28	23	0.72	(0.39	1.33)		11	0.9	(0.41	1.96)		3	0.62	(0.18	2.19)
409	Pendimethalin	lagged (10-year lag) duration >4 to 8 years	18	18	0.97	(0.48	1.94)		9	1.24	(0.52	2.94)		3	1.07	(0.29	3.86)
410	Pendimethalin	lagged (10-year lag) duration >8 years	5	9	1.33	(0.42	4.24)		3	1.5	(0.31	7.26)		2	1.68	(0.30	9.29)
411	Pendimethalin							0.94					0.55					0.72
412
413	Paraquat	never	5335	5378					993					1216					1104					987					565					257
414	Paraquat	ever-use	26	31	1.17	(0.67	2.04)		4	0.58	(0.19	1.74)		5	1.09	(0.40	2.98)		8	1.44	(0.61	3.41)		7	1.48	(0.60	3.64)		3	2.03	(0.34	12.2)		2	1.68	(0.36	7.81)
415
416	Paraquat	>0 to 5 years before diagnosis	3	9	2.06	(0.34	12.6)																	2	0.85	(0.04	20.0)
417	Paraquat	>5 to 10 years before diagnosis	5	11	1.31	(0.26	6.68)																	3	1.18	(0.07	20.9)
418	Paraquat	>10 to 20 years before diagnosis	13	20	1.7	(0.58	5.02)																	6	4.08	(0.72	23.2)
419	Paraquat	>20 years before diagnosis	21	17	0.46	(0.19	1.11)																	4	0.39	(0.08	1.94)
420
421	Paraquat	use in 1960s	5	5	0.86	(0.21	3.52)
422	Paraquat	use in 1970s	13	15	0.73	(0.26	2.07)
423	Paraquat	use in 1980s	15	24	1.62	(0.63	4.20)
424	Paraquat	use in 1990s	8	12	1.25	(0.35	4.41)
425	Paraquat	use in 2000s or later	2	2	0.6	(0.06	5.89)
426
427	Paraquat	lagged use (10-year lag)	25	25	0.94	(0.52	1.69)		2	0.29	(0.07	1.27)		3	0.65	(0.19	2.26)		7	1.25	(0.50	3.11)		7	1.52	(0.61	3.75)		2	0.94	(0.11	7.72)		2	1.67	(0.36	7.81)
428
429	Paraquat	duration <=4.5 years	15	13	1.01	(0.47	2.19)		2	0.5	(0.11	2.23)							4	1.32	(0.42	4.18)		3	1.6	(0.43	5.97)
430	Paraquat	duration >4.5 years	11	17	1.26	(0.57	2.78)		2	0.72	(0.15	3.55)							4	1.61	(0.46	5.66)		4	1.42	(0.43	4.70)
431	Paraquat							0.58					0.53										0.42					0.52
432
433	Paraquat	lagged (10-year lag) duration <=4.5 years	14	11	0.87	(0.38	1.96)												3	1.03	(0.28	3.73)		4	2.29	(0.70	7.46)
434	Paraquat	lagged (10-year lag) duration >4.5 years	11	14	1.03	(0.45	2.35)												4	1.64	(0.46	5.89)		3	1.12	(0.29	4.26)
435	Paraquat							0.98															0.49					0.72
436
437	Paraquat	duration <=4.5 years	15	13	1.01	(0.47	2.18)												4	1.33	(0.42	4.18)
438	Paraquat	duration >4.5 to 15 years	5	10	1.54	(0.51	4.65)												2	1.58	(0.26	9.38)
439	Paraquat	duration >15 years	6	7	1.01	(0.32	3.16)												2	1.8	(0.31	10.4)
440	Paraquat							0.76															0.43
441
442	Paraquat	lagged (10-year lag) duration <=4.5 years	14	11	0.87	(0.38	1.95)
443	Paraquat	lagged (10-year lag) duration >4.5 to 11 years	6	9	1.21	(0.41	3.54)
444	Paraquat	lagged (10-year lag) duration >11 years	5	5	0.8	(0.22	2.96)
445	Paraquat							0.86
